# Supplementary material for: Prevalence of HIV at the Kokoyo informal gold mining site: what lies behind the glitter of gold with regard to HIV epidemics in Mali? A community-based approach (the ANRS-12339 Sanu Gundo cross-sectional survey)
Source: PubMed Central journal article supplement — BMJ Open. 2017 Aug 3;7(8):e016558. doi: 10.1136/bmjopen-2017-016558 (PMC5629718; doi:10.1136/bmjopen-2017-016558), 2017-08-03
Supplement: bmjopen-2017-016558.draft_revisions.pdf [file bmjopen-2017-016558.draft_revisions.pdf]

# BMJ Open

BMJ Open is committed to open peer review. As part of this commitment we make the peer review history of every article we publish publicly available.

When an article is published we post the peer reviewers' comments and the authors' responses online. We also post the versions of the paper that were used during peer review. These are the versions that the peer review comments apply to.

The versions of the paper that follow are the versions that were submitted during the peer review process. They are not the versions of record or the final published versions. They should not be cited or distributed as the published version of this manuscript.

BMJ Open is an open access journal and the full, final, typeset and author-corrected version of record of the manuscript is available on our site with no access controls, subscription charges or pay-per-view fees (<http://bmjopen.bmj.com>).

If you have any questions on BMJ Open's open peer review process please email [editorial.bmjopen@bmj.com](mailto:editorial.bmjopen@bmj.com)

# BMJ Open

**Prevalence of HIV at the Kokoyo informal gold mining site:  
What lies behind the glitter of gold with regard to HIV  
epidemics in Mali? A community-based approach (The  
ANRS-12339 Sanu Gundo cross-sectional survey)**

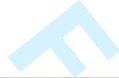

|                                 |                                                                                                                                                                                                                                                                                                                                                                                                                                                                                                                                                                                                                                                                                                                                                                                                                                                                                                                                                                                                                                                                                                                                                                                                                                                                                                                                                                                                                                |
|---------------------------------|--------------------------------------------------------------------------------------------------------------------------------------------------------------------------------------------------------------------------------------------------------------------------------------------------------------------------------------------------------------------------------------------------------------------------------------------------------------------------------------------------------------------------------------------------------------------------------------------------------------------------------------------------------------------------------------------------------------------------------------------------------------------------------------------------------------------------------------------------------------------------------------------------------------------------------------------------------------------------------------------------------------------------------------------------------------------------------------------------------------------------------------------------------------------------------------------------------------------------------------------------------------------------------------------------------------------------------------------------------------------------------------------------------------------------------|
| Journal:                        | <i>BMJ Open</i>                                                                                                                                                                                                                                                                                                                                                                                                                                                                                                                                                                                                                                                                                                                                                                                                                                                                                                                                                                                                                                                                                                                                                                                                                                                                                                                                                                                                                |
| Manuscript ID                   | bmjopen-2017-016558                                                                                                                                                                                                                                                                                                                                                                                                                                                                                                                                                                                                                                                                                                                                                                                                                                                                                                                                                                                                                                                                                                                                                                                                                                                                                                                                                                                                            |
| Article Type:                   | Research                                                                                                                                                                                                                                                                                                                                                                                                                                                                                                                                                                                                                                                                                                                                                                                                                                                                                                                                                                                                                                                                                                                                                                                                                                                                                                                                                                                                                       |
| Date Submitted by the Author:   | 23-Feb-2017                                                                                                                                                                                                                                                                                                                                                                                                                                                                                                                                                                                                                                                                                                                                                                                                                                                                                                                                                                                                                                                                                                                                                                                                                                                                                                                                                                                                                    |
| Complete List of Authors:       | Sagaon-Teyssier, Luis; Aix Marseille Univ, INSERM, IRD, SESSTIM, Sciences Economiques & Sociales de la Santé & Traitement de l'Information Médicale, ; ORS PACA, Observatoire régional de la santé Provence-Alpes-Côte d'Azur,<br>Balique, Hubert; Aix-Marseille Université Faculté de Médecine, Research unit EA 3279 : Public Health, Chronic Diseases and Quality of Life; ORS PACA, Observatoire régional de la santé Provence-Alpes-Côte d'Azur,<br>Diallo, Fodié; ARCAD SIDA<br>Mora, Marion; Aix Marseille Univ, INSERM, IRD, SESSTIM, Sciences Economiques & Sociales de la Santé & Traitement de l'Information Médicale; ORS PACA, Observatoire régional de la santé Provence-Alpes-Côte d'Azur,<br>Bourrelly, Michel; Aix Marseille Univ, INSERM, IRD, SESSTIM, Sciences Economiques & Sociales de la Santé & Traitement de l'Information Médicale; ORS PACA, Observatoire régional de la santé Provence-Alpes-Côte d'Azur,<br>Suzan-Monti, Marie; Aix Marseille Univ, INSERM, IRD, SESSTIM, Sciences Economiques & Sociales de la Santé & Traitement de l'Information Médicale; ORS PACA, Observatoire régional de la santé Provence-Alpes-Côte d'Azur,<br>Spire, Bruno; Aix Marseille Univ, INSERM, IRD, SESSTIM, Sciences Economiques & Sociales de la Santé & Traitement de l'Information Médicale; ORS PACA, Observatoire régional de la santé Provence-Alpes-Côte d'Azur,<br>Dembélé Keita, Bintou; ARCAD SIDA |
| <b>Primary Subject Heading</b>: | Health policy                                                                                                                                                                                                                                                                                                                                                                                                                                                                                                                                                                                                                                                                                                                                                                                                                                                                                                                                                                                                                                                                                                                                                                                                                                                                                                                                                                                                                  |
| Secondary Subject Heading:      | Epidemiology, HIV/AIDS                                                                                                                                                                                                                                                                                                                                                                                                                                                                                                                                                                                                                                                                                                                                                                                                                                                                                                                                                                                                                                                                                                                                                                                                                                                                                                                                                                                                         |
| Keywords:                       | HIV & AIDS < INFECTIOUS DISEASES, EPIDEMIOLOGY, Health policy < HEALTH SERVICES ADMINISTRATION & MANAGEMENT, PUBLIC HEALTH                                                                                                                                                                                                                                                                                                                                                                                                                                                                                                                                                                                                                                                                                                                                                                                                                                                                                                                                                                                                                                                                                                                                                                                                                                                                                                     |
|                                 |                                                                                                                                                                                                                                                                                                                                                                                                                                                                                                                                                                                                                                                                                                                                                                                                                                                                                                                                                                                                                                                                                                                                                                                                                                                                                                                                                                                                                                |

1  
2  
3  
4  
5  
6  
7  
8  
9  
10  
11  
12  
13  
14  
15  
16  
17  
18  
19  
20  
21  
22  
23  
24  
25  
26  
27  
28  
29  
30  
31  
32  
33  
34  
35  
36  
37  
38  
39  
40  
41  
42  
43  
44  
45  
46  
47  
48  
49  
50  
51  
52  
53  
54  
55  
56  
57  
58  
59  
60

SCHOLARONE™  
Manuscripts

For peer review only

1  
2  
3 **Prevalence of HIV at the Kokoyo informal gold mining site: What lies behind the glitter of gold with**  
4 **regard to HIV epidemics in Mali? A community-based approach (The ANRS-12339 Sanu Gundo**  
5 **cross-sectional survey)**  
6

7 Luis Sagaon-Teyssier<sup>1,2,\*</sup>, Hubert Balique<sup>2</sup>, Fodié Diallo<sup>3</sup>, Marion Mora<sup>1,2</sup>, Michel Bourrelly<sup>1,2</sup>, Marie  
8 Suzan-Monti<sup>1,2</sup>, Bruno Spire<sup>1,2</sup>, Bintou Dembélé Keita<sup>3</sup>  
9

10  
11  
12 <sup>1</sup>Aix Marseille Univ, INSERM, IRD, SESSTIM, Sciences Economiques & Sociales de la Santé & Traitement de  
13 l'Information Médicale, Marseille, France.

14  
15 <sup>2</sup>ORS PACA, Observatoire régional de la santé Provence-Alpes-Côte d'Azur, Marseille, France.

16  
17 <sup>3</sup>ARCAD SIDA, Bamako, Mali.

18  
19 \*Corresponding author: Luis Sagaon-Teyssier (luis.sagaon-teyssier@inserm.fr)  
20 Address : Faculté de Médecine, 27 Bd Jean Moulin, 13385 Marseille cedex 5 France  
21 Telephone: +33 4 13 73 22 77  
22

23  
24 **Funding**  
25

26 The Sanu Gundo survey was sponsored and funded by the French National Agency for Research on Aids and  
27 Viral Hepatitis (ANRS) grant ANRS-12339 Sanu Gundo.  
28  
29

30  
31 **Abstract**  
32

33 **Objectives:** The aim of this article was to estimate HIV prevalence and the factors associated with  
34 HIV seropositivity using data from the Sanu Gundo cross-sectional survey conducted at the informal  
35 artisanal small-scale gold mining (IASGM) site of Kokoyo in Mali. Our main hypothesis was that HIV  
36 prevalence is higher in the context of IASGM than in the whole country.  
37  
38

39  
40 **Settings:** The ANRS-12339 Sanu Gundo survey was conducted in December 2015 at Kokoyo, one of  
41 the largest IASGM sites in Mali with a population oscillating between 6 000 and 10 000 people. the  
42 Malian NGO ARCAD-SIDA, organized prevention activities, proposed rapid tests for HIV and invited  
43 people to take part in the survey. HIV prevalence was calculated for the sample, and for the different  
44 groups according to the type of activity in IASGM. A Probit logistic regression was implemented to  
45 estimate the characteristics associated with HIV seropositivity.  
46  
47  
48  
49

50 **Participants:** 224 respondents: 37.5% were gold-diggers, 33% retail traders, 6.7% *tombolomas* (i.e.  
51 traditional guards), 9% female sex-workers, while 14% reported another activity (mainly street  
52 vendors).  
53  
54  
55

56 **Primary and secondary outcome measures:** HIV prevalence and HIV prevalence according groups  
57 defined by their activity in the Kokoyo IASGM.  
58  
59  
60

1  
2  
3 **Results:** HIV prevalence was 8% 98%CI[7.7%-8.3%], which is much higher than the 2015 national  
4 prevalence of 1.3% (UNAIDS). Probability of HIV seropositivity was 7.8% (p=0.037) higher for female  
5 non sex-workers than for any other category, and this probability increased significantly with age.  
6  
7

8 **Conclusions:** Our results demonstrate the importance of focusing on different categories of workers  
9 and the necessity to conduct further similar research on other Malian IASGM sites, in order to  
10 account for structural and geographical heterogeneity. Integrated policy-making should pay special  
11 attention to infectious diseases among populations in IASGM zones. Bringing information/prevention  
12 activities closer to people working in gold-bearing zones is an urgent public health action.  
13  
14  
15

#### 16 **Strengths and limitations of this study**

- 17 - This is the first study conducted in an informal and artisanal small-scale gold mining site in  
18 Mali involving all people directly or indirectly involved in informal mining activities.
- 19 - This study was conducted under the community-based framework, the survey design and  
20 research questions were elaborated with representatives of the informal mine of Kokoyo.
- 21 - The highest prevalence was found among female not sex-workers (13%) pointing out the  
22 importance of focusing on other less studied populations.
- 23 - There was an important proportion of participants in the survey that had never had a HIV  
24 test highlighting the importance of “proximity health services”
- 25 - The cross-sectional design of the Sanu Gundo survey did not enable us to analyse changes  
26 over time concerning different aspects, such as living and working conditions, seasonal  
27 mobility, and sexual behaviour  
28  
29  
30  
31  
32  
33  
34  
35  
36  
37

#### 38 **Introduction**

39  
40 The poverty-driven activities and demographic conditions in the world’s informal artisanal small-scale  
41 gold mining (IASGM) sector contribute to its vulnerability to infectious diseases including HIV. This  
42 disease is recognized as one of the main public health issues in this sector, and potentially concerns  
43 close to 15 million people involved in IASGM activities across 70 countries <sup>1</sup>. Despite the high-risk of  
44 transmission <sup>2,3</sup>, and sustaining the spread of the disease <sup>4,5</sup>, very little is known about HIV epidemics  
45 in IASGM sites. Existing HIV literature on people working and living in gold mining sites mainly  
46 focuses on behavioural aspects, such as prevention <sup>6</sup>, attitudes towards voluntary counselling and  
47 testing <sup>7,8</sup>, the link between alcohol consumption and HIV <sup>9</sup>, and the role of gender in the response to  
48 HIV <sup>3,10,11</sup>. Furthermore, most studies have either been conducted among workers in industrial gold  
49 mines or in mining communities near gold-bearing zones which are not exclusively related to the  
50 IASGM sector. This is also the case for the few studies examining HIV prevalence: in South Africa in  
51  
52  
53  
54  
55  
56  
57  
58  
59  
60

1  
2  
3 the last decade was approximately 25%<sup>3,12,13</sup>, 22.3% for a group of Mozambican gold miners in 2012,  
4 and 4.5% and 6.4% for Guinea in 2001 and 2007, respectively<sup>14</sup>. We found only one study concerning  
5 an IASGM site, in the Amazon region of Guyana, where HIV prevalence was 6.5%<sup>15</sup>. In addition, these  
6 studies principally focus on gold miners themselves and/or other presupposed at risk groups (e.g.  
7 female sex-workers), with little attention given to other categories of potentially high-risk people  
8 such as gold diggers (i.e. miners working in the informal sector), street vendors, and women who are  
9 not sex-workers, playing an important role in transmission and/or mobility of HIV. Indeed, focusing  
10 only on gold miners may divert the attention from these other high-risk groups<sup>2</sup>, as demonstrated by  
11 Clift *et al.*<sup>16</sup> in a community near two industrial gold-mines in Tanzania, where HIV prevalence was  
12 lower in mine workers (6%) than in men and women living at the mines but not directly involved in  
13 mining (respectively, 16% and 18%).

20  
21 Gold mining is one of the cornerstones of the Malian economy, representing almost 70% of the  
22 country's total exports and 8% of the GDP in 2013<sup>17-19</sup>. Between 200 000 and 400 000 persons are  
23 estimated to be directly concerned by IASGM activities<sup>20,21</sup>. Despite the economic importance of the  
24 sector, little attention has been paid to health, demonstrated by the poor medical services provided  
25 in these sites<sup>22,23</sup> and the increasing demand for health, especially concerning HIV. The high  
26 prevalence observed in some key-populations provides a picture of the situation people may face in  
27 these sites. A demographic and health survey (EDSMV) conducted in Mali in 2012 showed that HIV  
28 prevalence among female sex-workers (24.2%), female street vendors (3.7%), and truckers (2.7%)  
29 was clearly higher than the national prevalence of approximately 1.2% in the same year. A few  
30 reports on IASGM in Mali have highlighted the urgent need to include the health dimension in  
31 economic-based research programs, especially concerning HIV. Community activities must be  
32 integrated into these programs as a tool to obtaining a greater understanding of the heterogeneity of  
33 IASGM, the functioning of this informal labour market<sup>2,24</sup>, and the impact of IASGM sector on the  
34 transmission and spread of infectious diseases.

44  
45 In this context, we conducted the ANRS-12339 Sanu Gundo survey of the IASGM site at Kokoyo in  
46 Mali's Koulikoro region in December 2015, using a community-based research approach. The  
47 objective of this article was to estimate HIV prevalence - using the Sanu Gundo survey - for different  
48 groups present at Kokoyo, and the factors associated with HIV seropositivity.

## 51 **Methods**

### 52 ***The survey and population***

56 The ANRS-12339 Sanu Gundo survey was conducted in December 2015 at Kokoyo (during 2 weeks),  
57 one of the largest IASGM sites in Mali with a population oscillating between 6 000 and 10 000  
58  
59

1  
2  
3 people, depending on the season (rainy/dry). In collaboration with the Chamber of Mines and the  
4 Mines Ministry, this site was chosen given its geographical location implying a great deal of  
5 heterogeneity as people not only come from other Malian regions, but also from other neighbouring  
6 countries (Burkina Faso, Guinea, Nigeria, and Niger).  
7  
8

9  
10 The study started with conversations about global health topics with a focus on HIV/STI prevention  
11 conducted by ARCAD-SIDA. Participants in the conversations were informed about the community-  
12 based services provided by the mobile ARCAD-SIDA unit including the provision of a medical check-up  
13 and essential medicines including those for treating STI. Furthermore, ARCAD-SIDA proposed rapid  
14 tests for HIV and invited people to take part in the survey. Eligibility criteria included: 1) aged at least  
15 18 years; 2) able to speak French, Bambara, or English; and 3) able to provide written consent.  
16 Persons under the effects of alcohol and/or drugs were excluded. The convenience sample is formed  
17 by 224 participants that were randomly included in the study.  
18  
19

20  
21 The *quantitative survey* consisted in a brief face-to-face questionnaire administered by trained  
22 investigators who collected information about the following: 1) sociodemographic/socioeconomic  
23 characteristics; 2) type of activity and mobility between sites; 3) HIV awareness, assessed with the  
24 following questions: have you heard about HIV? Have you ever been tested for HIV before today? Do  
25 you know your HIV status?; and 4) risky behaviours: alcohol and drugs consumption, sexual self-  
26 definition, type(s) and frequency of intercourse. The *qualitative survey* organized the participants  
27 into 5 activity-specific focus groups with semi-structured discussions about prevention and access to  
28 care for HIV/STI: Malian gold-diggers, Non-Malian gold-diggers, female sex-workers, female non sex-  
29 workers, and people guaranteeing the organizational functioning at the gold mine site (*damantiguis*  
30 and *tombolomas*). All procedures and documents used were validated by both French (CCTIRS  
31 N°15.917) and Malian (N°2015/65/CE/FMPOS) ethics committees.  
32  
33  
34  
35  
36  
37  
38  
39  
40  
41

#### 42 **Statistical analyses**

43  
44 The sample was described and HIV prevalence calculated for the overall sample, and for the different  
45 groups according to the type of activity in the gold mining site. A Probit logistic regression was  
46 implemented to estimate the characteristics associated with the probability of HIV seropositivity. All  
47 statistical analyses were conducted using R software<sup>25</sup>.  
48  
49  
50

#### 51 **Results**

##### 52 **Sample characteristics**

53  
54 The quantitative survey was conducted on convenience sample of 224 participants interested in  
55 prevention and medical activities provides by ARCAD-SIDA (Table 1): 101 women (45.1%) and 123  
56  
57  
58  
59  
60

men (54.9%). There was a significant difference in average age between both genders: 25 and 29 years old ( $p < 0.001$ ), respectively. With respect to participants' main residence, 133 (59.4%) declared they lived in Mali: 28.5% in Kokoyo (i.e. autochthonous) and 71.5% from different cities (i.e. non-autochthonous) including Danga (the nearest) and Timbuktu (the farthest). The remaining 91 participants (40.6%) declared another country as their principal place of residence. Concerning marital status, 158 participants (70.5% of participants) declared they were married or lived in a couple. Among them, 50.6% lived with their spouse in Kokoyo and the remaining 49.4% were geographically single. Indeed, 72.1% of the 86 married/in a couple males who did not live with their spouse in Kokoyo declared living with another partner at the site, whereas the proportion of geographically single women was only 22.2% among the sample's 72 married/in a couple females, and none of them declared having another partner at the site. Socio-economic difficulties were observed in terms of education level, with 49.1% of the 224 participants reporting they had never been to school. Among the others, 27.7% and 9.8% had, respectively, a primary and secondary school educational level, 12.1% had a Koranic educational background, and 1.3% declared having post-secondary school education. With respect to their activity in Kokoyo, among the 224 respondents 37.5% were gold-diggers, 33% retail traders, 6.7% *tombolomas*, 9% female sex-workers, while 14% reported another activity (mainly street vendors). Approximately half of the sample comprised people living under the poverty threshold of 1.9 US\$ per day: 49.3% compared with 49.1% in the general Malian population (2009)<sup>26</sup>. Finally, 11.6% reported mobility between IASGM sites, and declared that Kokoyo was not the first IASGM site where they worked.

**Table 1. Sample characteristics (n=224)**

|                               | n (%)      |
|-------------------------------|------------|
| <b>Gender</b>                 |            |
| Male                          | 123 (54.9) |
| Female                        | 101 (45.1) |
| <b>Age: mean(sd)</b>          | 27.5 (8.3) |
| <b>Main residence country</b> |            |
| Mali                          | 133 (59.4) |
| Other countries               | 91 (40.6)  |
| <b>Marital status</b>         |            |
| Married or living in a couple | 158 (70.5) |
| Single, divorced, widowed     | 66 (29.5)  |



**Educational level**

|                      |            |
|----------------------|------------|
| Never been to school | 110 (49.1) |
| Primary              | 62 (27.7)  |
| Secondary            | 22 (9.8)   |
| Koranic              | 27 (12.1)  |
| Post-secondary       | 3 (1.3)    |

**Category of participant**

|                                          |           |
|------------------------------------------|-----------|
| Gold-diggers                             | 84 (37.5) |
| Retail traders                           | 74 (33.0) |
| Tombolomas                               | 15 (6.7)  |
| Female sex-workers                       | 20 (8.9)  |
| Other activities (mainly street vendors) | 31 (13.8) |

**Under the poverty threshold (1.9 US\$ per day)**

|     |            |
|-----|------------|
| Yes | 110 (49.1) |
| No  | 114 (50.9) |

**Have worked in other IASGM before Kokoyo**

|     |            |
|-----|------------|
| Yes | 26 (11.6)  |
| No  | 198 (88.4) |

---

*HIV prevalence and new diagnoses*

Seventeen new HIV-positive cases were found with the ARCAD-SIDA testing, among those tested at the time of the survey, and 1 HIV-positive case was self-reported. Overall, HIV prevalence was 8%, which is much higher than the 2015 national prevalence of 1.3% (UNAIDS)<sup>27</sup>. HIV prevalence was higher in women than in men, respectively, 10.4 and 5.9%. In terms of the 5 different categories studied, the highest HIV prevalence was in women who were not sex-workers (13%). Although lower than in women not sex-workers, prevalence in female sex-workers was higher (3.7%) at the Kokoyo site than the national prevalence for sex-workers. Prevalence in both non-Malian and Malian male gold-diggers was high, respectively, 7.7% and 6.5% whereas prevalence in males other than gold diggers was 6.4%. No HIV-positive case was observed in traditional guards.

The quantitative survey showed that 63.4% participants (142 out of 224) had never had a HIV test. Of these, 7 (4.9%) - 5 women and 2 men - tested positive for HIV using ARCAD-SIDA's test. This corresponded to 38.9% of the total 18 (11 women and 7 men) HIV seropositive participants observed, (or 45.5% (5/11) of total HIV women and 28.6% (2/7) of total HIV men). Among the 5 HIV positive cases for women 1 was a sand washer, 1 was female sex-worker and 3 were street vendors.

Among the 2 HIV positive cases for men 1 was a non-Malian gold digger and 1 was a male street vendor.

#### Factors associated to HIV seropositivity

Multivariate probit regression was implemented to estimate the factors associated with HIV seropositivity among the 224 participants in the quantitative survey (Table 2). Estimates show that the probability of HIV seropositivity was 7.8% ( $p=0.037$ ) higher for female non sex-workers than for any other category, and this probability increased significantly with age. Indeed, the probability of HIV seropositivity - with respect to the youngest participants (aged between 18 and 21 years) – was 14.1% ( $p=0.034$ ), 14.2% ( $p=0.036$ ) and 16.1% ( $p=0.021$ ) higher for participants aged 22-26 years, 27-29 years, and 30+ years, respectively. Finally, a 10.9% lower probability of HIV seropositivity was observed in participants who perceived their health status as good (versus poor).

**Table 2. Factors associated with HIV seropositivity (n=224)**

| Covariates                                      | Marginal Effects <sup>1</sup> (dF/dX) | Coefficient | 95% CI |        |
|-------------------------------------------------|---------------------------------------|-------------|--------|--------|
|                                                 |                                       |             | Inf.   | Sup.   |
| Intercept                                       |                                       | 0.089       | 0.024  | 0.238  |
| <b>Category of participant</b>                  |                                       |             |        |        |
| Ref : Malian gold diggers and <i>tombolomas</i> |                                       |             |        |        |
| Women sex-workers                               | 0.019                                 | 1.161       | 0.350  | 3.105  |
| Women non sex-workers                           | 0.078                                 | 1.857       | 1.043  | 3.399  |
| Non-Malian gold diggers                         | -0.010                                | 0.926       | 0.239  | 2.658  |
| <b>Age<sup>2</sup></b>                          |                                       |             |        |        |
| Ref: 18 to 21 years                             |                                       |             |        |        |
| 22 to 26                                        | 0.141                                 | 3.055       | 1.204  | 10.388 |
| 27 to 30                                        | 0.142                                 | 3.089       | 1.193  | 10.671 |
| 30+                                             | 0.161                                 | 3.593       | 1.325  | 12.902 |
| <b>Self-perceived health status</b>             |                                       |             |        |        |
| Good health status                              | -0.109                                | 0.422       | 0.232  | 0.736  |
| Ref: Poor health status                         |                                       |             |        |        |
| <b>Weekly earnings<sup>3</sup></b>              |                                       |             |        |        |
| Earnings ≤ median                               | 0.036                                 | 1.330       | 0.774  | 2.322  |
| Ref: Earnings > median                          |                                       |             |        |        |

<sup>1</sup> Is the change in the probability given the change in each independent continuous variable and reports the discrete change in the probability for dichotomous variables.

<sup>2</sup> Age categories' cut-offs correspond to quartiles.

<sup>3</sup> The median weekly earning is 14 500 FCFA (25 US\$). This variable was used to account for the socioeconomic status of participants.

### *Main findings of the qualitative survey*

Five focus groups were carried out over 28 participants according to gender and professional status: 6 *tombolomas*, 6 Malian male gold diggers, 5 non-Malian male gold diggers, 5 women sex-workers and 6 women non sex-workers. The first discourse identified refers to sexual practices, especially non-systematic condom use, women sex-workers charging extra for condomless sexual intercourse, and the undisclosed use of female condoms. Participants attributed these practices to the following factors: the place where sexual intercourse took place: bars *versus* the street; the nationality/ethnicity of female sex-workers: Malians and Guineans were seen as more “flexible” than Nigerians (considered as “strict”) with regards to condom use; and the nature of the relationship between men and women: trustful relationships (considered “safer”) than strictly commercial-sex relationships (considered “risky”). The second discourse identified referred to health services access, with the main barrier being the long distances. Other barriers evoked were the high price of medicines, the lack of specialists and other health care providers, as well as the poor number and quality of HIV/STI information/prevention programmes described as the main reasons why participants resorted to traditional medicine.

### **Discussion**

This is the first study conducted in an informal and artisanal small-scale gold mining site in Mali which investigates HIV not only in those directly involved in informal mining (i.e. gold diggers), but also in other populations with a related activity at the site. The aims of the present article emerged from the need for the authorities of the IASGM site at Kokoyo to characterize the population living there, and to provide community-based prevention and HIV testing as part of the health care services offered.

The low education level observed and the high proportion of participants living with revenues below the 1.9 US\$ poverty-line threshold, confirmed the poverty-driven characteristic of IASGM sites reported in the literature concerning other countries with large gold-bearing zones<sup>22,28</sup>. The fluctuation of the population suggests large-scale cyclical migration of workers (i.e. they stay for a period, go back home, and the next season they return either to the same or to another mine), and as Rees et al. suggested, they are often separated from their family (i.e. geographically single)<sup>12</sup>. This is confirmed by our results where 71.5% of Malian participants came from other regions of Mali (non-autochthonous), and 40.6% of the total sample were not Malian. Moreover, geographically single individuals accounted for 49.4% of the 158 participants who reported being married or living in

1  
2  
3 a couple. This “bridge population” cohabits with other high-risk groups in the IASGM site at Kokoyo  
4 representing potential source for the sustained spread of infectious diseases - including HIV - at the  
5 site, and at their home <sup>4,5</sup>. Indeed, being single (geographically or not) is associated with risky  
6 behaviours, given the freedom from social norms and the economic difficulties that prevail in IASGM  
7 sites <sup>2</sup>. Furthermore, working conditions and the inherent related dangers which male gold diggers  
8 are confronted with, have also been identified as factors related to an increase in risky behaviours  
9  
10  
11  
12  
13  
14

15 This is the first time that HIV prevalence has been estimated in an IASGM site in Mali. We found a HIV  
16 prevalence of 8% in the 224 participants in our study, which is much higher than the Malian national  
17 prevalence of 1.3% estimated in 2015, this is in line with the 7% estimated for the IASGM site of  
18 Tenkoto in the Kédougou region of Senegal <sup>31</sup>. In addition, HIV prevalence varied for the different  
19 categories studied, ranging between 3.6% for female sex-workers to 13% for both women gold  
20 diggers and women street vendors. The latter value is in line with the 13% estimated for street  
21 vendors in Burkina Faso, although that value was not specific to IASGM sites <sup>32</sup>. Our estimates not  
22 only reflect the results from the few qualitative studies performed to date which suggest high  
23 prevalence of HIV in IASGM sites, but also highlight that accounting for other categories of people  
24 than simply those directly involved in mining, other “less classic” groups are seen to be at higher risk  
25  
26  
27  
28  
29  
30  
31  
32

33 The acceptability of HIV testing by participants observed in this study demonstrated not only that the  
34 community-based dimension is crucial to conduct this kind of research <sup>2,7</sup>, but that it is also useful for  
35 the provision of prevention and HIV testing to this population. This is one of the main contributions  
36 of our analysis, and highlights the large demand-supply gap for health care services in Kokoyo.  
37 Indeed, the nearest Rural Health Community Centre (CSCOM, *Centre de Santé Communautaire*) does  
38 not provide either prevention or testing for HIV, and the only two centres of voluntary testing in the  
39 Koulikoro region are far from gold-bearing zones, especially the IASGM site of Kokoyo. This  
40 community-based research identified a large number of new HIV positive cases, and this is another  
41 important contribution of the study. Most specifically, 38% among the 18 HIV positive participants in  
42 the quantitative survey corresponded to new diagnoses using ARCAD-SIDA’s rapid tests. Women  
43 were mostly concerned (5 out of 11 positive cases in women were new diagnoses), especially street  
44 vendors. Although ARCAD-SIDA referred all 18 HIV positive participants to the nearest regional  
45 hospitals (CSREF) in order to link them to care, the emerging question is whether or not these  
46 participants subsequently initiated and adhered to antiretroviral treatment given the distance of  
47 more than 100km between Kokoyo and Kangaba city where the CSREF is located. Unfortunately, we  
48 have no information about lost-to-follow-up rates in people living with HIV in the context of IASGM  
49  
50  
51  
52  
53  
54  
55  
56  
57  
58  
59  
60

1  
2  
3 sites, but presumably these rates are high given that HIV is not of primary concern to people in  
4 IASGM sites, as suggested by Campbell<sup>3</sup>. This certainly seems to be the situation in Kokoyo, where  
5 the large majority of study participants aware of HIV (over 90%) had never previously gone for a test  
6 (63.4%). Multivariate analyses pointed out female non sex-workers, the eldest participants, and  
7 those with poor self-perceived health status as the three sub-populations most associated with HIV  
8 seropositivity.  
9

10  
11  
12 Some limitations should be acknowledged. First, the study sample is not representative of the whole  
13 population in IASGM sites in Mali. However, our results seemed to reflect those in the literature.  
14 Second, the cross-sectional design of the Sanu Gundo survey did not enable us to analyse changes  
15 over time concerning different aspects, such as living and working conditions, seasonal mobility, and  
16 sexual behaviour. Furthermore, although the participants who tested positive for HIV during the  
17 study were referred to the regional hospital, the design of the survey did not allow us collect  
18 subsequent information, either concerning linkage-to-care or antiretroviral treatment initiation.  
19 Finally, there is a possibility of selection bias, as the sample was drawn from the healthcare  
20 conversation audience organized by ARCAD-SIDA. This selection bias would reflect an audience  
21 mainly comprising individuals interested in prevention and to some extent, worried by health issues,  
22 especially HIV. One would expect that any future study whose design were to attract participants  
23 other than those already interested in health care, would result in higher HIV prevalence being  
24 measured and would accentuate the precarious characteristics already described by our survey at  
25 Kokoyo. Despite these limitations, our study contributes to the existing literature by creating a  
26 knowledge base which could be a useful first step for the development of suitable surveys and  
27 interventions.  
28  
29  
30  
31  
32  
33  
34  
35  
36  
37  
38  
39

## 40 **Conclusion**

41  
42 The results of this study demonstrate the importance of focusing on different categories of workers  
43 and the necessity to conduct further similar research on other Malian IASGM sites, in order to  
44 account for structural and geographical heterogeneity. The present article contributes to the  
45 literature by reopening the debate about the impact of Health issues on IASGM activities, especially  
46 HIV issues, in a context where the sustained spread of this disease could not only harm efforts in the  
47 fight against AIDS, but also have important negative consequences in one of the main cornerstones  
48 of the Malian economy. Integrated policy-making should pay special attention to infectious diseases  
49 among populations in IASGM zones. Bringing information/prevention activities closer to people  
50 working in gold-bearing zones is an urgent public health action.  
51  
52  
53  
54  
55  
56  
57  
58  
59  
60

### Authors contribution

LST designed and led the study and wrote the first draft of the report. LST, MSM, BS and BDK designed the analysis. LST, HB and FD analysed the data. MM and MB oversaw data management. All authors critically reviewed and approved the manuscript.

### References

1. A Simple Public Health Strategy for ASGM - Artisanal Gold Council. (2014). Available at: <http://www.artisanalgold.org/publications/articles/a-simple-public-health-strategy-for-asgm>. (Accessed: 28th August 2016)
2. Desmond, N. *et al.* A typology of groups at risk of HIV/STI in a gold mining town in north-western Tanzania. *Soc. Sci. Med.* **60**, 1739–1749 (2005).
3. Campbell, C. Migrancy, masculine identities and AIDS: the psychosocial context of HIV transmission on the South African gold mines. *Soc. Sci. Med.* **45**, 273–281 (1997).
4. Cates, W. J. & Dallabetta, G. The staying power of sexually transmitted diseases. *The Lancet* **354 (S4)**, (1999).
5. Jokonya, O. Towards a Big Data Framework for the Prevention and Control of HIV/AIDS, TB and Silicosis in the Mining Industry. *Procedia Technol.* **16**, 1533–1541 (2014).
6. Kiš, A. D. ABC for AIDS prevention in Guinea: migrant gold mining communities address their risks. *AIDS Care* **22**, 520–525 (2010).
7. Day, J. H. *et al.* Attitudes to HIV voluntary counselling and testing among mineworkers in South Africa: Will availability of antiretroviral therapy encourage testing? *AIDS Care* **15**, 665–672 (2003).

- 1  
2  
3 8. Sikasote, J., Grant, L., Chinn, D. J., Macwang'i, M. & Murray, S. A. Voluntary  
4  
5 counselling and testing for HIV in a Zambian mining community: serial interviews with  
6  
7 people testing negative. *Sex. Transm. Infect.* **87**, 433–438 (2011).
- 8  
9  
10 9. Lightfoot, E., Maree, M. & Ananias, J. Exploring the relationship between HIV and  
11  
12 alcohol use in a remote Namibian mining community. *Afr. J. AIDS Res.* **8**, 321–327  
13  
14 (2009).
- 15  
16 10. Siu, G. E., Seeley, J. & Wight, D. Dividuality, masculine respectability and reputation:  
17  
18 How masculinity affects men's uptake of HIV treatment in rural eastern Uganda. *Soc. Sci.*  
19  
20 *Med.* **89**, 45–52 (2013).
- 21  
22 11. Siu, G. E., Wight, D. & Seeley, J. How a masculine work ethic and economic  
23  
24 circumstances affect uptake of HIV treatment: experiences of men from an artisanal gold  
25  
26 mining community in rural eastern Uganda. *J. Int. AIDS Soc.* **15**, (2012).
- 27  
28 12. Rees, D., Murray, J., Nelson, G. & Sonnenberg, P. Oscillating migration and the  
29  
30 epidemics of silicosis, tuberculosis, and HIV infection in South African gold miners. *Am.*  
31  
32 *J. Ind. Med.* **53**, 398–404 (2009).
- 33  
34 13. Stevens, W., Apostolellis, A., Napier, G., Scott, L. & Gresak, G. HIV/AIDS prevalence  
35  
36 testing-merits, methodology and outcomes of a survey conducted at a large mining  
37  
38 organisation in South Africa. *S. Afr. Med. J.* **96**, 134 (2008).
- 39  
40 14. Diallo, B.-L., Alary, M., Rashed, S. & Barry, A. Épidémie du VIH chez les hommes  
41  
42 travaillant dans les mines industrielles de Guinée : séroprévalence, facteurs de risque  
43  
44 associés et tendance 2001–2007. *Rev. D'Épidémiologie Santé Publique* **59**, 251–257  
45  
46 (2011).
- 47  
48 15. Palmer, C. J. *et al.* HIV prevalence in a gold mining camp in the Amazon region, Guyana.  
49  
50 (2002).
- 51  
52  
53  
54  
55  
56  
57  
58  
59  
60

16. Clift, S. *et al.* Variations of HIV and STI prevalences within communities neighbouring new goldmines in Tanzania: importance for intervention design. *Sex. Transm. Infect.* **79**, 307–312 (2003).
17. Traore, M. Some critical reflections on the future of gold mining in Mali. *Extr. Ind. Soc.* **3**, 367–369 (2016).
18. Bastagli, F., Toulmin, C., European Parliament & Directorate-General for External Policies of the Union. *Mali, the economic factors behind the crisis.* (Publications Office, 2014).
19. *Initiative pour la transparence dans les industries extractives ITIE-Mali: Rapport ITIE pour l'année 2013.* (2013).
20. Keita, S. Study on artisanal and small-scale mining in Mali. *Min. Miner. Sustain. Dev. MMSD Work. Pap.* **80**, (2001).
21. Hilson, G. & McQuilken, J. Four decades of support for artisanal and small-scale mining in sub-Saharan Africa: A critical review. *Extr. Ind. Soc.* **1**, 104–118 (2014).
22. Buxton, A. Responding to the challenge of artisanal and small-scale mining. *Can Knowl. Netw. Help* (2013).
23. Teschner, B. A. 'Orpaillage pays for everything': How artisanal mining supported rural institutions following Mali's coup d'état. *Futures* **62**, 140–150 (2014).
24. Verbrugge, B. Voices from below: Artisanal- and small-scale mining as a product and catalyst of rural transformation. *J. Rural Stud.* **47**, 108–116 (2016).
25. R Core Team. *R: A language and environment for statistical computing.* R Foundation for Statistical Computing. (2016).
26. Ratio de la population pauvre en fonction du seuil de pauvreté national (% de la population rurale) | Data. Available at:



1  
2  
3 <http://donnees.banquemondiale.org/indicateur/SI.POV.RUHC?locations=ML>. (Accessed:  
4  
5 22nd August 2016)  
6

7 27. Mali | UNAIDS. Available at: <http://www.unaids.org/en/regionscountries/countries/mali>.

8  
9 (Accessed: 22nd August 2016)  
10

11 28. Yakovleva, N. Perspectives on female participation in artisanal and small-scale mining: A  
12 case study of Birim North District of Ghana. *Resour. Policy* **32**, 29–41 (2007).  
13

14 29. Kotsadam, A. & Tolonen, A. African Mining, Gender, and Local Employment. *World*  
15  
16 *Dev.* **83**, 325–339 (2016).  
17

18 30. Bellaby, P. To risk or not to risk? Uses and limitations of Mary Douglas on risk  
19  
20 acceptability for understanding health and safety at work and road accidents. *Sociol. Rev.*  
21  
22 **38**, 465–483 (1990).  
23  
24

25 31. *Focus sur Bantako, zone d'orpaillage traditionnelle: La vulnérabilité au VIH dans les*  
26  
27 *zones d'orpaillages traditionnelles.* (2009).  
28  
29

30 32. *Programme d'appui au monde associatif et communautaire (PAMAC): pour la période*  
31  
32 *2011-2015.* (2011).  
33  
34  
35

36  
37  
38 **Competing statement: Authors declare no conflict of interest**

39  
40 **Data sharing statement:**

41  
42 Full dataset and statistical code available from the corresponding author at [luis.sagaon-teyssier@inserm.fr](mailto:luis.sagaon-teyssier@inserm.fr). The  
43  
44 presented data are anonymized and risk of identification is null.  
45  
46  
47  
48  
49  
50  
51  
52  
53  
54  
55  
56  
57  
58  
59  
60

STROBE 2007 (v4) Statement—Checklist of items that should be included in reports of *cross-sectional studies*

| Section/Topic                | Item # | Recommendation                                                                                                                                                                       | Reported on page # |
|------------------------------|--------|--------------------------------------------------------------------------------------------------------------------------------------------------------------------------------------|--------------------|
| Title and abstract           | 1      | (a) Indicate the study's design with a commonly used term in the title or the abstract                                                                                               | 1                  |
|                              |        | (b) Provide in the abstract an informative and balanced summary of what was done and what was found                                                                                  | 2                  |
| <b>Introduction</b>          |        |                                                                                                                                                                                      |                    |
| Background/rationale         | 2      | Explain the scientific background and rationale for the investigation being reported                                                                                                 | 2-3                |
| Objectives                   | 3      | State specific objectives, including any prespecified hypotheses                                                                                                                     | 3                  |
| <b>Methods</b>               |        |                                                                                                                                                                                      |                    |
| Study design                 | 4      | Present key elements of study design early in the paper                                                                                                                              | 4                  |
| Setting                      | 5      | Describe the setting, locations, and relevant dates, including periods of recruitment, exposure, follow-up, and data collection                                                      | 4                  |
| Participants                 | 6      | (a) Give the eligibility criteria, and the sources and methods of selection of participants                                                                                          | 4                  |
| Variables                    | 7      | Clearly define all outcomes, exposures, predictors, potential confounders, and effect modifiers. Give diagnostic criteria, if applicable                                             | 4                  |
| Data sources/<br>measurement | 8*     | For each variable of interest, give sources of data and details of methods of assessment (measurement). Describe comparability of assessment methods if there is more than one group | NA                 |
| Bias                         | 9      | Describe any efforts to address potential sources of bias                                                                                                                            | 4                  |
| Study size                   | 10     | Explain how the study size was arrived at                                                                                                                                            | 4                  |
| Quantitative variables       | 11     | Explain how quantitative variables were handled in the analyses. If applicable, describe which groupings were chosen and why                                                         | 4                  |
| Statistical methods          | 12     | (a) Describe all statistical methods, including those used to control for confounding                                                                                                | 4                  |
|                              |        | (b) Describe any methods used to examine subgroups and interactions                                                                                                                  | NA                 |
|                              |        | (c) Explain how missing data were addressed                                                                                                                                          | NA                 |
|                              |        | (d) If applicable, describe analytical methods taking account of sampling strategy                                                                                                   | NA                 |
|                              |        | (e) Describe any sensitivity analyses                                                                                                                                                | NA                 |
| <b>Results</b>               |        |                                                                                                                                                                                      |                    |

|                          |     |                                                                                                                                                                                                              |    |
|--------------------------|-----|--------------------------------------------------------------------------------------------------------------------------------------------------------------------------------------------------------------|----|
| Participants             | 13* | (a) Report numbers of individuals at each stage of study—eg numbers potentially eligible, examined for eligibility, confirmed eligible, included in the study, completing follow-up, and analysed            | NA |
|                          |     | (b) Give reasons for non-participation at each stage                                                                                                                                                         | NA |
|                          |     | (c) Consider use of a flow diagram                                                                                                                                                                           | NA |
| Descriptive data         | 14* | (a) Give characteristics of study participants (eg demographic, clinical, social) and information on exposures and potential confounders                                                                     | 5  |
|                          |     | (b) Indicate number of participants with missing data for each variable of interest                                                                                                                          | NA |
| Outcome data             | 15* | Report numbers of outcome events or summary measures                                                                                                                                                         | 6  |
| Main results             | 16  | (a) Give unadjusted estimates and, if applicable, confounder-adjusted estimates and their precision (eg, 95% confidence interval). Make clear which confounders were adjusted for and why they were included | 7  |
|                          |     | (b) Report category boundaries when continuous variables were categorized                                                                                                                                    | 7  |
|                          |     | (c) If relevant, consider translating estimates of relative risk into absolute risk for a meaningful time period                                                                                             | NA |
| Other analyses           | 17  | Report other analyses done—eg analyses of subgroups and interactions, and sensitivity analyses                                                                                                               | NA |
| <b>Discussion</b>        |     |                                                                                                                                                                                                              |    |
| Key results              | 18  | Summarise key results with reference to study objectives                                                                                                                                                     | 8  |
| Limitations              | 19  | Discuss limitations of the study, taking into account sources of potential bias or imprecision. Discuss both direction and magnitude of any potential bias                                                   | 10 |
| Interpretation           | 20  | Give a cautious overall interpretation of results considering objectives, limitations, multiplicity of analyses, results from similar studies, and other relevant evidence                                   | 10 |
| Generalisability         | 21  | Discuss the generalisability (external validity) of the study results                                                                                                                                        | 10 |
| <b>Other information</b> |     |                                                                                                                                                                                                              |    |
| Funding                  | 22  | Give the source of funding and the role of the funders for the present study and, if applicable, for the original study on which the present article is based                                                |    |

\*Give information separately for cases and controls in case-control studies and, if applicable, for exposed and unexposed groups in cohort and cross-sectional studies.

**Note:** An Explanation and Elaboration article discusses each checklist item and gives methodological background and published examples of transparent reporting. The STROBE checklist is best used in conjunction with this article (freely available on the Web sites of PLoS Medicine at <http://www.plosmedicine.org/>, Annals of Internal Medicine at <http://www.annals.org/>, and Epidemiology at <http://www.epidem.com/>). Information on the STROBE Initiative is available at [www.strobe-statement.org](http://www.strobe-statement.org).

# BMJ Open

**Prevalence of HIV at the Kokoyo informal gold mining site:  
What lies behind the glitter of gold with regard to HIV  
epidemics in Mali? A community-based approach (The  
ANRS-12339 Sanu Gundo cross-sectional survey)**

|                                 |                                                                                                                                                                                                                                                                                                                                                                                                                                                                                                                                                                                                                                                                                                                                                                                                                                                                                                                                                                                                                                                                                                                                                                                                                                                                                                                                                                                                                                                                                                                                                                                                                              |
|---------------------------------|------------------------------------------------------------------------------------------------------------------------------------------------------------------------------------------------------------------------------------------------------------------------------------------------------------------------------------------------------------------------------------------------------------------------------------------------------------------------------------------------------------------------------------------------------------------------------------------------------------------------------------------------------------------------------------------------------------------------------------------------------------------------------------------------------------------------------------------------------------------------------------------------------------------------------------------------------------------------------------------------------------------------------------------------------------------------------------------------------------------------------------------------------------------------------------------------------------------------------------------------------------------------------------------------------------------------------------------------------------------------------------------------------------------------------------------------------------------------------------------------------------------------------------------------------------------------------------------------------------------------------|
| Journal:                        | <i>BMJ Open</i>                                                                                                                                                                                                                                                                                                                                                                                                                                                                                                                                                                                                                                                                                                                                                                                                                                                                                                                                                                                                                                                                                                                                                                                                                                                                                                                                                                                                                                                                                                                                                                                                              |
| Manuscript ID                   | bmjopen-2017-016558.R1                                                                                                                                                                                                                                                                                                                                                                                                                                                                                                                                                                                                                                                                                                                                                                                                                                                                                                                                                                                                                                                                                                                                                                                                                                                                                                                                                                                                                                                                                                                                                                                                       |
| Article Type:                   | Research                                                                                                                                                                                                                                                                                                                                                                                                                                                                                                                                                                                                                                                                                                                                                                                                                                                                                                                                                                                                                                                                                                                                                                                                                                                                                                                                                                                                                                                                                                                                                                                                                     |
| Date Submitted by the Author:   | 10-May-2017                                                                                                                                                                                                                                                                                                                                                                                                                                                                                                                                                                                                                                                                                                                                                                                                                                                                                                                                                                                                                                                                                                                                                                                                                                                                                                                                                                                                                                                                                                                                                                                                                  |
| Complete List of Authors:       | <p>Sagaon-Teyssier, Luis; Aix Marseille Univ, INSERM, IRD, SESSTIM, Sciences Economiques &amp; Sociales de la Santé &amp; Traitement de l'Information Médicale, ; ORS PACA, Observatoire régional de la santé Provence-Alpes-Côte d'Azur,</p> <p>Balique, Hubert; Aix-Marseille Université Faculté de Médecine, Research unit EA 3279 : Public Health, Chronic Diseases and Quality of Life; ORS PACA, Observatoire régional de la santé Provence-Alpes-Côte d'Azur,</p> <p>Diallo, Fodié; ARCAD SIDA</p> <p>Kalampalikis, Nikos; University Lyon 2, Institute of Psychology, Social Psychology Research Group (EA 4163)</p> <p>Mora, Marion; Aix Marseille Univ, INSERM, IRD, SESSTIM, Sciences Economiques &amp; Sociales de la Santé &amp; Traitement de l'Information Médicale; ORS PACA, Observatoire régional de la santé Provence-Alpes-Côte d'Azur,</p> <p>Bourrelly, Michel; Aix Marseille Univ, INSERM, IRD, SESSTIM, Sciences Economiques &amp; Sociales de la Santé &amp; Traitement de l'Information Médicale; ORS PACA, Observatoire régional de la santé Provence-Alpes-Côte d'Azur,</p> <p>Suzan-Monti, Marie; Aix Marseille Univ, INSERM, IRD, SESSTIM, Sciences Economiques &amp; Sociales de la Santé &amp; Traitement de l'Information Médicale; ORS PACA, Observatoire régional de la santé Provence-Alpes-Côte d'Azur,</p> <p>Spire, Bruno; Aix Marseille Univ, INSERM, IRD, SESSTIM, Sciences Economiques &amp; Sociales de la Santé &amp; Traitement de l'Information Médicale; ORS PACA, Observatoire régional de la santé Provence-Alpes-Côte d'Azur,</p> <p>Dembélé Keita, Bintou; ARCAD SIDA</p> |
| <b>Primary Subject Heading</b>: | Health policy                                                                                                                                                                                                                                                                                                                                                                                                                                                                                                                                                                                                                                                                                                                                                                                                                                                                                                                                                                                                                                                                                                                                                                                                                                                                                                                                                                                                                                                                                                                                                                                                                |
| Secondary Subject Heading:      | Epidemiology, HIV/AIDS                                                                                                                                                                                                                                                                                                                                                                                                                                                                                                                                                                                                                                                                                                                                                                                                                                                                                                                                                                                                                                                                                                                                                                                                                                                                                                                                                                                                                                                                                                                                                                                                       |
| Keywords:                       | HIV & AIDS < INFECTIOUS DISEASES, EPIDEMIOLOGY, Health policy < HEALTH SERVICES ADMINISTRATION & MANAGEMENT, PUBLIC HEALTH                                                                                                                                                                                                                                                                                                                                                                                                                                                                                                                                                                                                                                                                                                                                                                                                                                                                                                                                                                                                                                                                                                                                                                                                                                                                                                                                                                                                                                                                                                   |
|                                 |                                                                                                                                                                                                                                                                                                                                                                                                                                                                                                                                                                                                                                                                                                                                                                                                                                                                                                                                                                                                                                                                                                                                                                                                                                                                                                                                                                                                                                                                                                                                                                                                                              |

1  
2  
3  
4  
5  
6  
7  
8  
9  
10  
11  
12  
13  
14  
15  
16  
17  
18  
19  
20  
21  
22  
23  
24  
25  
26  
27  
28  
29  
30  
31  
32  
33  
34  
35  
36  
37  
38  
39  
40  
41  
42  
43  
44  
45  
46  
47  
48  
49  
50  
51  
52  
53  
54  
55  
56  
57  
58  
59  
60

SCHOLARONE™  
Manuscripts

For peer review only

1  
2  
3 **Prevalence of HIV at the Kokoyo informal gold mining site: What lies behind the glitter of gold with**  
4 **regard to HIV epidemics in Mali? A community-based approach (The ANRS-12339 Sanu Gundo**  
5 **cross-sectional survey)**  
6

7 Luis Sagaon-Teyssier<sup>1,2,\*</sup>, Hubert Balique<sup>2</sup>, Fodié Diallo<sup>3</sup>, Nikos Kalampalakis<sup>4</sup>, Marion Mora<sup>1,2</sup>, Michel  
8 Bourrelly<sup>1,2</sup>, Marie Suzan-Monti<sup>1,2</sup>, Bruno Spire<sup>1,2</sup>, Bintou Dembélé Keita<sup>3</sup>  
9

10  
11  
12 <sup>1</sup>Aix Marseille Univ, INSERM, IRD, SESSTIM, Sciences Economiques & Sociales de la Santé & Traitement de  
13 l'Information Médicale, Marseille, France.

14  
15 <sup>2</sup>ORS PACA, Observatoire régional de la santé Provence-Alpes-Côte d'Azur, Marseille, France.

16  
17 <sup>3</sup>ARCAD SIDA, Bamako, Mali.

18  
19 <sup>4</sup>University Lyon 2, Institute of Psychology, Social Psychology Research Group (EA 4163), 5  
20 avenue P. Mendès-France, 69676 Bron, France.

21  
22 \*Corresponding author: Luis Sagaon-Teyssier (luis.sagaon-teyssier@inserm.fr)  
23 Address : Faculté de Médecine, 27 Bd Jean Moulin, 13385 Marseille cedex 5 France  
24 Telephone: +33 4 13 73 22 77  
25

26  
27 **Funding**  
28

29 The Sanu Gundo survey was sponsored and funded by the French National Agency for Research on Aids and  
30 Viral Hepatitis (ANRS) grant ANRS-12339 Sanu Gundo.  
31  
32

33  
34 **Abstract**  
35

36 **Objectives:** The aim of this article was to estimate HIV prevalence and the factors associated with  
37 HIV seropositivity in the population living and working at the informal artisanal small-scale gold  
38 mining (IASGM) site of Kokoyo in Mali, using data from the Sanu Gundo cross-sectional survey. Our  
39 main hypothesis was that HIV prevalence is higher in the context of IASGM than in the country as a  
40 whole.  
41  
42  
43  
44

45 **Settings:** The ANRS-12339 Sanu Gundo survey was conducted in December 2015 at Kokoyo, one of  
46 the largest IASGM sites in Mali (between 6 000 and 10 000 people). The quantitative survey consisted  
47 in face-to-face administration of questionnaires. Five focus groups were conducted for the  
48 qualitative survey. HIV prevalence was calculated for the sample, and for the different sub-groups  
49 within the sample, according to the type of activity performed in IASGM. A Probit logistic regression  
50 was implemented to estimate the characteristics associated with HIV seropositivity.  
51  
52  
53  
54  
55  
56  
57  
58  
59  
60

1  
2  
3 **Participants:** 224 respondents: 37.5% were gold-diggers, 33% retail traders, 6.7% *tombolomas* (i.e.  
4 traditional guards), and 9% female sex-workers. The remaining 13.8% reported another activity  
5 (mainly street vending).  
6  
7

8 **Primary and secondary outcome measures:** HIV prevalence and HIV prevalence according to sub-  
9 group, as defined by their activity at the Kokoyo IASGM.  
10

11 **Results:** HIV prevalence for the total sample was 8% 95%CI[7.7%-8.3%], which is much higher than  
12 the 2015 national prevalence of 1.3% (UNAIDS). The probability of HIV seropositivity was 7.8%  
13 (p=0.037) higher for female non sex-workers than for any other category, and this probability  
14 increased significantly with age. Qualitative data revealed the non-systematic use of condoms with  
15 sex-workers; and long distance from health services was the main barrier to accessing care.  
16  
17

18 **Conclusions:** Integrated policy-making should pay special attention to infectious diseases among  
19 populations in IASGM zones. Bringing information/prevention activities closer to people working in  
20 gold-mining zones is an urgent public health action.  
21

#### 22 **Strengths and limitations of this study**

- 23  
24  
25  
26  
27  
28  
29 - This is the first study conducted in an informal and artisanal small-scale gold mining site in  
30 Mali including all of the people directly or indirectly involved in the site's activities.  
31  
32 - This study was implemented using a community-based research approach, the survey design  
33 and research questions being developed in collaboration with representatives of the mine of  
34 Kokoyo.  
35  
36 - The highest HIV prevalence was found among female non sex-workers (13%), which  
37 highlights the importance of focusing on high-risk less-studied populations.  
38  
39 - A large proportion of participants in the survey had never had a HIV test, which highlights the  
40 importance of "close proximity health services"  
41  
42 - The cross-sectional design of the Sanu Gundo survey did not enable us to analyse changes  
43 over time concerning several socio-economic and behavioural aspects, such as living and  
44 working conditions, seasonal mobility, or sexual behaviour  
45  
46  
47  
48

#### 49 **Introduction**

50  
51 The poverty-driven activities and demographic conditions in the world's informal artisanal small-scale  
52 gold mining (IASGM) sector contribute to its vulnerability to infectious diseases including HIV. This  
53 disease is recognized as one of the main public health issues in this sector, and potentially concerns  
54 almost 15 million people involved in IASGM activities across 70 countries <sup>1</sup>. Despite the high risk of  
55 transmission <sup>2,3</sup>, and sustained spread of the disease <sup>4,5</sup>, very little is known about HIV epidemics in  
56  
57  
58  
59  
60

1  
2  
3 IASGM sites. Existing HIV literature on people working and living in gold mining sites mainly focuses  
4 on behavioural aspects, such as prevention<sup>6</sup>, attitudes towards voluntary counselling and testing<sup>7,8</sup>,  
5 the link between alcohol consumption and HIV<sup>9</sup>, and the role of gender in the fight against HIV<sup>3,10,11</sup>.  
6 Furthermore, most studies have either been conducted among workers in industrial gold mines or in  
7 mining communities near gold-bearing zones which are not exclusively related to the IASGM sector.  
8 This is also the case of the few studies examining HIV prevalence, which in South Africa in the last  
9 decade was measured at approximately 25%<sup>3,12,13</sup>, at 22.3% for a group of Mozambican gold miners  
10 in 2012, and at 4.5% and 6.4% for Guinea in 2001 and 2007, respectively<sup>14</sup>. We found only one study  
11 concerning an IASGM site, specifically in the Amazon region of Guyana. HIV prevalence there was  
12 6.5%<sup>15</sup>. In addition, these studies principally focus on gold miners themselves and/or other  
13 presupposed most-at-risk groups (e.g. female sex-workers), with little attention given to other  
14 categories of potentially high-risk people such as gold diggers (i.e. miners working in the informal  
15 sector), women who are not sex-workers, and street vendors, all of whom play an important role in  
16 the transmission and/or mobility of HIV. Indeed, focusing only on gold miners and not including these  
17 other high-risk groups may be detrimental to the fight against HIV<sup>2</sup>, as demonstrated by Clift *et al.*<sup>16</sup>  
18 in a community near two industrial gold-mines in Tanzania, where HIV prevalence was lower in mine  
19 workers (6%) than in men and women living at the mines but not directly involved in mining  
20 (respectively, 16% and 18%).  
21  
22  
23  
24  
25  
26  
27  
28  
29  
30  
31

32 Gold mining is one of the cornerstones of the Malian economy, representing almost 70% of the  
33 country's total exports and 8% of the GDP in 2013<sup>17-19</sup>. Between 200 000 and 400 000 persons are  
34 estimated to be directly concerned by IASGM activities<sup>20,21</sup>. Despite the economic importance of the  
35 sector, little attention has been paid to health, as demonstrated by both the poor medical services  
36 provided in these sites<sup>22,23</sup> and the increasing demand for health, especially concerning HIV. The high  
37 prevalence observed in some key populations provides a picture of the situation people may face in  
38 these sites. A demographic and health survey (EDSMV) conducted in Mali in 2012 showed that HIV  
39 prevalence among female sex-workers (24.2%), female street vendors (3.7%), and truckers (2.7%)  
40 was much higher than the national prevalence of approximately 1.2% in the same year. Different  
41 reports on IASGM in Mali have highlighted the urgent need to include the health dimension in  
42 economic-based research programs, especially concerning HIV. Community-based activities (e.g.,  
43 prevention, screening, counselling etc.) could help do this as they could help provide a greater  
44 understanding of the heterogeneity of IASGM, the functioning of this informal labour market<sup>2,24</sup>, and  
45 the impact of IASGM sector on the transmission and spread of infectious diseases.  
46  
47  
48  
49  
50  
51  
52  
53  
54

55 We conducted the ANRS-12339 Sanu Gundo survey of the IASGM site at Kokoyo in Mali's Koulikoro  
56 region in December 2015, using a community-based research approach. The objective of this article  
57  
58  
59  
60



1  
2  
3 was to estimate HIV prevalence - using the Sanu Gundo survey – in different groups present at  
4 Kokoyo, and the factors associated with HIV seropositivity.  
5  
6

## 7 **Methods**

### 8 ***Settings and design***

9  
10  
11 The ANRS-12339 Sanu Gundo survey was conducted in December 2015 at Kokoyo (for 2 weeks), one  
12 of the largest IASGM sites in Mali with a population oscillating between 6 000 and 10 000 people,  
13 depending on the season (rainy/dry). In collaboration with the Chamber of Mines and the Mines  
14 Ministry, this site was chosen for its geographical location because of the great deal of cultural  
15 heterogeneity there. People come not only from other Malian regions, but also from neighbouring  
16 countries (Burkina Faso, Guinea, Nigeria, and Niger).  
17  
18  
19  
20

21  
22 The study started with conversations about global health topics with a focus on HIV/STI prevention  
23 which were facilitated by ARCAD-SIDA members. Participants in the conversations were informed  
24 about the community-based services provided by the mobile ARCAD-SIDA unit, including the  
25 provision of a medical check-up and essential medicines including those for treating STI.  
26 Furthermore, ARCAD-SIDA proposed rapid tests for HIV and invited people to take part in the survey.  
27 For HIV screening, ARCAD-SIDA follows the Malian Ministry of Health recommendations using  
28 Determine® rapid tests, and ImmunoComb® II for confirmation. ARCAD-SIDA provided counselling  
29 about the importance of being treated to participants testing HIV positive, and referred them to  
30 regional health care centres (Centre de Santé de Référence, CSREF) for blood assessment and  
31 inclusion in treatment and follow-up programmes.  
32  
33  
34  
35  
36  
37

38  
39 Participants in the conversations were then invited to participate in the qualitative and quantitative  
40 surveys (they could choose either or both) which formed the basis for the ANRS-12339 Sanu Gundo  
41 survey. Community-based agents sent those interested to the Malian team of researchers, who in  
42 turn provided detailed information about the content of the survey, its main objectives, and the  
43 advantages/risks of participating in this kind of survey. Survey participants provided written formal  
44 consent to participate in the survey(s) by signing a letter of consent. All procedures and documents  
45 used were validated by both French (CCTIRS N°15.917) and Malian (N°2015/65/CE/FMPOS) ethics  
46 committees.  
47  
48  
49  
50

### 51 ***Participants***

1  
2  
3 Eligibility criteria included: i) aged 18 years or older; ii) able to speak French, Bambara, or English; iii)  
4 able to provide written consent to participate. Persons under the effects of alcohol and/or drugs  
5 were excluded. For the *quantitative survey*, 224 participants constituted the convenience sample. In  
6 order to reduce any potential over-representation and under-representation sampling bias, ARCAD-  
7 SIDA activities were conducted every day at different time slots and locations at the site in order to  
8 adapt participant recruitment to the work schedule of the different categories of people living there.  
9 To those who agreed to participate in the survey(s), a brief face-to-face questionnaire was  
10 administered by trained investigators who collected information about the following : i)  
11 sociodemographic and socioeconomic characteristics: age (continuous variable), gender, marital  
12 status, country of residence, educational level, and weekly earnings (dichotomized at the median of  
13 14 500 FCFA, approximately 24.26 US\$ ) ; ii) type of activity and mobility between sites; iii) HIV  
14 awareness, assessed with the following questions: “Have you heard about HIV?” “Have you ever  
15 been tested for HIV before today?”, “Do you know your HIV status?”; iv) risky behaviours: alcohol  
16 and drugs consumption, sexual self-definition, type(s) and frequency of intercourse; v) perceived  
17 health status, assessed with the following question: “How do you consider your state of health  
18 today?”, with possible answers including “very poor”, “poor”, “moderate”, “good”, and “very good”.  
19 This variable was equal to 1 for those perceiving their health was good or very good, and 0 for those  
20 perceiving they had poor or very poor health. For the *qualitative survey*, purposive sampling was  
21 implemented. This seemed to be the most suitable sampling method as the main objective of the  
22 qualitative survey was to collect information about prevention and access to care for HIV/STI among  
23 specific groups. The sample size for each group was fixed between 5 and 8 survey participants in  
24 order to ensure diversity among them. Five activity-specific focus groups were organized: Malian  
25 gold-diggers, Non-Malian gold-diggers, female sex-workers, female non sex-workers, and people  
26 guaranteeing the organizational functioning at the gold mine site (*damantiguis* and *tombolomas*).  
27  
28  
29  
30  
31  
32  
33  
34  
35  
36  
37  
38  
39  
40  
41  
42  
43  
44

#### 45 **Statistical analyses**

46  
47 The sample was described and HIV prevalence calculated both for the overall sample, and for the  
48 different sub-groups listed above (i.e., according to the type of activity in the gold mining site). A  
49 Probit logistic regression was implemented to estimate the characteristics associated with the  
50 probability of HIV seropositivity. Given the nature of the normal distribution assumption of the error  
51 term in the Probit estimation, coefficients are not affected by the presence of extreme values in  
52 independent variables. Furthermore, Probit regression allows the computation of marginal effects  
53 that are more flexible and more informative than odd-ratios<sup>25,26</sup> which tend to be larger in the  
54  
55  
56  
57  
58  
59  
60

presence of rare events and are in any case preferred for small samples<sup>27</sup>. Marginal effects,  $dF/dX$ , are interpreted as instantaneous rates of change: for a dichotomous explanatory variable, a marginal effect shows how predicted probabilities change when the variable changes from 0 to 1. All statistical analyses were performed using R software<sup>28</sup>.

## Results

### *Sample characteristics*

The quantitative survey was conducted on a convenience sample of 224 participants interested in prevention and medical activities provided by ARCAD-SIDA (Table 1): 101 women (45.1%) and 123 men (54.9%). There was a significant difference in average age between both genders: 25 and 29 years old respectively. With respect to participants' main residence, 133 (59.4%) declared they lived in Mali: 28.5% in Kokoyo (i.e. autochthonous) and 71.5% from different cities (i.e. non-autochthonous) including Danga (the nearest) and Timbuktu (the farthest). The remaining 91 participants (40.6%) declared another country as their principal place of residence. With respect to marital status, 158 participants (70.5% of the whole sample) declared they were married or lived in a couple. Among them, 50.6% lived with their spouse in Kokoyo and the remaining 49.4% were geographically single. Of the 86 married/in a couple males who did not live with their spouse in Kokoyo 72.1% declared living with another partner at the site. Conversely, the proportion of geographically single women was only 22.2% among the sample's 72 married/in-a-couple females, and none declared having another partner at the site. Socio-economic difficulties were observed in terms of educational level, with 49.1% of the 224 participants reporting they had never been to school. Among the others, 27.7% and 9.8% had, respectively, a primary and secondary school educational level, 12.1% had a Koranic educational background, and 1.3% declared having post-secondary school education. With respect to their activity in Kokoyo, among the 224 respondents 37.5% were gold-diggers, 33% retail traders, 6.7% *tombolomas*, 9% female sex-workers, while 14% reported another activity (mainly street vending). Approximately half of the sample comprised people living under the poverty threshold of 1.9 US\$ per day: 49.3% compared with 49.1% in the general Malian population (2009)<sup>29</sup>. Finally, 11.6% reported mobility between IASGM sites, and declared that Kokoyo was not the first IASGM site where they had worked.

**Table 1. Sample characteristics of participants living in the informal artisanal small-scale gold mining site (IASGM) of Kokoyo in Mali (n=224)**

| Variables | n (%) |
|-----------|-------|
|-----------|-------|

|                                                 |                                                           |            |
|-------------------------------------------------|-----------------------------------------------------------|------------|
| <b>Gender</b>                                   |                                                           |            |
|                                                 | Male                                                      | 123 (54.9) |
|                                                 | Female                                                    | 101 (45.1) |
| <b>Age<sup>2</sup></b>                          |                                                           |            |
|                                                 | Ref: 18 to 21 years                                       | 57 (25.4)  |
|                                                 | 22 to 26                                                  | 60 (26.8)  |
|                                                 | 27 to 30                                                  | 53 (23.7)  |
|                                                 | 30+                                                       | 54 (24.1)  |
| <b>Main residence country</b>                   |                                                           |            |
|                                                 | Mali                                                      | 133 (59.4) |
|                                                 | Other countries                                           | 91 (40.6)  |
| <b>Marital status</b>                           |                                                           |            |
|                                                 | Married or living in a couple                             | 158 (70.5) |
|                                                 | Single, divorced, widowed                                 | 66 (29.5)  |
| <b>Educational level</b>                        |                                                           |            |
|                                                 | Never been to school                                      | 110 (49.1) |
|                                                 | Primary                                                   | 62 (27.7)  |
|                                                 | Secondary                                                 | 22 (9.8)   |
|                                                 | Koranic                                                   | 27 (12.1)  |
|                                                 | Post-secondary                                            | 3 (1.3)    |
| <b>Category of participant</b>                  |                                                           |            |
|                                                 | Malian gold-diggers, tombolomas, and other malian workers | 130 (58)   |
|                                                 | Women sex-workers                                         | 27 (12,1)  |
|                                                 | Women non sex-workers                                     | 54 (24,1)  |
|                                                 | Non-malian gold diggers                                   | 13 (5,8)   |
| <b>Self-perceived health status</b>             |                                                           |            |
|                                                 | Good health status                                        | 133 (59,4) |
|                                                 | Ref: Poor health status                                   | 91 (40,6)  |
| <b>Weekly earnings<sup>3</sup></b>              |                                                           |            |
|                                                 | Earnings ≤ median                                         | 112 (50)   |
|                                                 | Ref: Earnings > median                                    | 112 (50)   |
| <b>Have worked in other IASGM before Kokoyo</b> |                                                           |            |
|                                                 | Yes                                                       | 26 (11.6)  |
|                                                 | No                                                        | 198 (88.4) |

### *HIV prevalence and new diagnoses*

Seventeen new HIV-positive cases were found with the ARCAD-SIDA testing, among those tested at the time of the survey, and 1 HIV-positive case was self-reported. Overall, HIV prevalence was 8% 95%CI[4.5%, 11.6%]. HIV prevalence was higher in women than in men, respectively, 10.4 95%CI[4.5%, 16.2%] and 5.9% 95%CI[1.7%, 6.5%]. In terms of the 5 different categories studied, the highest HIV prevalence was in women who were not sex-workers (13% 95%CI[5.4%, 20.3%]). Although lower than in the latter group, the prevalence in female sex-workers was still higher (3.7% 95%CI[-3.5%, 10.9%]) at the Kokoyo site than the national prevalence for sex-workers (irrespective of gender). Prevalence in both non-Malian and Malian male gold-diggers was high, respectively, 7.7% 95%CI[-7.4%, 22.8%] (90%CI[-4.9%, 20.4%]) and 6.5% 95%CI[-0.7%, 13.7%] (90%CI[0.5%, 12.6%]), whereas prevalence in males other than gold diggers was 6.4% 95%CI[-0.7%, 13.5%] (90%CI[0.5%, 12.3%]). No HIV-positive case was observed in traditional guards (*tombolomas*).

The quantitative survey showed that 63.4% participants (142 out of 224) had never had a HIV test. Of these, 7 (4.9%) - 5 women and 2 men - tested positive for HIV using ARCAD-SIDA's test. This corresponded to 38.9% of the total 18 (11 women and 7 men) HIV seropositive participants observed, (or 45.5% (5/11) of total HIV women and 28.6% (2/7) of total HIV men). Among the 5 HIV positive cases for women, 1 was a sand washer, 1 was a female sex-worker and 3 were street vendors. Among the 2 HIV positive cases for men, 1 was a non-Malian gold digger and 1 a male street vendor.

### *Factors associated to HIV seropositivity*

A multivariate probit regression was implemented to estimate the factors associated with HIV seropositivity among the 224 participants in the quantitative survey (Table 2). Estimates show that the probability of HIV seropositivity was 7.8% ( $p=0.037$ ) higher for female non sex-workers than for any other category, and this probability increased significantly with age. Indeed, the probability of HIV seropositivity - with respect to the youngest participants (aged between 18 and 21 years) - was 14.1% ( $p=0.034$ ), 14.2% ( $p=0.036$ ) and 16.1% ( $p=0.021$ ) higher for participants aged 22-26 years, 27-29 years, and 30+ years, respectively. Finally, a 10.9% lower probability of HIV seropositivity was observed in participants who perceived their health status as good (versus poor).

**Table 2. Factors associated with HIV seropositivity among participants living in the informal artisanal small-scale gold mining site (IASGM) of Kokoyo in Mali (n=224)**

| Covariates                                      | Marginal Effects <sup>1</sup> (dF/dX) | Coefficient | 95% CI |        | P-value |
|-------------------------------------------------|---------------------------------------|-------------|--------|--------|---------|
|                                                 |                                       |             | Inf.   | Sup.   |         |
| <b>Intercept</b>                                |                                       | -2.413      | -3.716 | -1.431 | <0.001  |
| <b>Category of participant</b>                  |                                       |             |        |        |         |
| Ref : Malian gold diggers and <i>tombolomas</i> | Ref.                                  | Ref.        |        |        |         |
| Women sex-workers                               | 0.019                                 | 0.151       | -1.048 | 1.134  | 0.780   |
| Women non sex-workers                           | 0.078                                 | 0.624       | 0.046  | 1.231  | 0.036   |
| Non-Malian gold diggers                         | -0.010                                | -0.057      | -1.423 | 1.015  | 0.924   |
| <b>Age<sup>2</sup></b>                          |                                       |             |        |        |         |
| Ref: 18 to 21 years                             | Ref.                                  | Ref.        |        |        |         |
| 22 to 26                                        | 0.141                                 | 1.105       | 0.175  | 2.332  | 0.036   |
| 27 to 30                                        | 0.142                                 | 1.115       | 0.162  | 2.358  | 0.039   |
| 30+                                             | 0.161                                 | 1.268       | 0.271  | 2.548  | 0.022   |
| <b>Self-perceived health status</b>             |                                       |             |        |        |         |
| Good health status                              | -0.109                                | -0.862      | -1.459 | -0.307 | 0.003   |
| Ref: Poor health status                         | Ref.                                  | Ref.        |        |        |         |
| <b>Weekly earnings<sup>3</sup></b>              |                                       |             |        |        |         |
| Earnings ≤ median                               | 0.036                                 | 0.282       | -0.261 | 0.840  | 0.310   |
| Ref: Earnings > median                          | Ref.                                  | Ref.        |        |        |         |

<sup>1</sup> Is the change in the probability given the discrete change for dichotomous variables.

<sup>2</sup> Age categories' cut-offs correspond to quartiles.

<sup>3</sup> The median weekly earning is 14 500 FCFA (25 US\$). This variable was used to account for the socioeconomic status of participants.

### *Main findings of the qualitative survey*

Five focus groups were carried out over 28 participants according to gender and professional status: 6 *tombolomas*, 6 Malian male gold diggers, 5 non-Malian male gold diggers, 5 female sex-workers and 6 women non sex-workers. Among the discourses identified, one referred to sexual practices, especially non-systematic condom use, women sex-workers charging extra for condomless sexual intercourse, and the undisclosed use of condoms by women. Participants attributed these practices to the following factors: i) the place where sexual intercourse took place: bars *versus* the street; ii) the nationality/ethnicity of female sex-workers: Malians and Guineans were seen as more “flexible” than Nigerians (considered as “strict”) with regards to condom use; and iii) the nature of the relationship between men and women: trustful relationships (considered “safer”) than strictly

1  
2  
3 commercial-sex relationships (considered “risky”). Another discourse identified referred to health  
4 services access, with the main barrier being the long distances involved. Other barriers mentioned  
5 were the high price of medicines, the lack of specialists and other health care providers, as well as  
6 the low number and poor quality of HIV/STI information/prevention programmes described. These  
7 barriers were also the main reasons why participants resorted to traditional medicine.  
8  
9  
10

## 11 Discussion

12  
13  
14 This is the first study conducted in an informal and artisanal small-scale gold mining site in Mali which  
15 investigates HIV not only in those directly involved in informal mining (i.e. gold diggers), but also in  
16 other populations with a related activity. The aims of this article were drawn up specifically to  
17 respond to the need for the authorities of the IASGM site at Kokoyo to characterize the population  
18 living there, and to provide community-based prevention and HIV testing as part of the health care  
19 services offered.  
20  
21  
22  
23  
24

25  
26 The low educational level observed and the high proportion of participants living with revenues  
27 below the 1.9 US\$ poverty-line threshold, reflects the high level of poverty reported in the literature  
28 concerning IASGM sites in other countries with large gold-bearing zones<sup>22,30</sup>. The fluctuation of the  
29 population at Kokoyo suggests large-scale cyclical migration of workers (i.e. they stay for a period, go  
30 back home, and the next season they return either to the same mine or to another). Rees et al.  
31 suggested they such workers are often separated from their family (i.e. geographically single)<sup>12</sup>,  
32 something confirmed by our results where 71.5% of Malian participants came from other regions of  
33 Mali (non-autochthonous), and 40.6% of the total sample were not Malian. Moreover, geographically  
34 single individuals accounted for 49.4% of the 158 participants who reported being married or living in  
35 a couple. This “bridge population” cohabits with other high-risk groups in the IASGM site at Kokoyo,  
36 representing a potential source for the continued spread of infectious diseases - including HIV - at  
37 the site, and at their home<sup>4,5</sup>. Indeed, being single (geographically or not) is associated with risky  
38 behaviours, given the freedom from social norms and the economic difficulties that prevail in IASGM  
39 sites<sup>2</sup>. Furthermore, working conditions and the inherent related dangers which male gold diggers  
40 are confronted with, have also been identified as factors related to an increase in risky behaviours  
41  
42  
43  
44  
45  
46  
47  
48  
49  
50  
51  
52  
53  
54  
55  
56  
57  
58  
59  
60

This is the first time that HIV prevalence has been estimated in an IASGM site in Mali. We found a  
prevalence of 8% in the 224 participants in our study, which is much higher than the Malian national  
prevalence of 1.3% estimated in 2015<sup>32</sup>, but is in line with the 7% estimated for the IASGM site of  
Tenkoto in the Kédougou region of Senegal<sup>33</sup>. In addition, HIV prevalence varied for the different



1  
2  
3 categories studied, ranging between 3.6% for female sex-workers to 13% for both women gold  
4 diggers and women street vendors. The latter value is in line with the 13% estimated for street  
5 vendors in Burkina Faso, although that value was not specific to IASGM sites<sup>34</sup>. Our estimates not  
6 only reflect the results from the few qualitative studies performed to date which suggest high  
7 prevalence of HIV in IASGM sites, but also highlight that “less classic” groups (i.e. those not directly  
8 involved in mining) are at higher risk<sup>2</sup>. The different HIV prevalence rates found across groups may  
9 reflect the lack of prevention programs adapted to key populations other than sex-workers in Mali.  
10 Most of the efforts in the fight against HIV/AIDS in Mali are concentrated on female sex-workers and  
11 men having sex with other men (MSM), who are identified as the most vulnerable groups. This could  
12 explain - at least in part - the low prevalence rate among female sex-workers in Kokoyo IASGM and  
13 the higher prevalence among other groups, including female non-sex workers and gold-diggers.  
14 Indeed participants from these two categories expressed during the focus groups that prevention  
15 campaigns are mostly directed at female sex-workers, who seem to be more informed about the risk  
16 of HIV contamination and about prevention tools.  
17  
18  
19  
20  
21  
22  
23  
24  
25

26 The acceptability of HIV testing by participants observed in this study demonstrated not only that the  
27 community-based dimension is crucial to conduct this kind of research<sup>2,7</sup>, but that it is also useful for  
28 the provision of prevention and HIV testing to this population. Of the 236 persons invited to test for  
29 HIV, only 5% refused. This is one of the main contributions of our analysis, and highlights the large  
30 demand-supply gap for health care services in Kokoyo. Indeed, the nearest Rural Health Community  
31 Centre (CSCOM, *Centre de Santé Communautaire*) does not provide either prevention or testing for  
32 HIV, and the only two centres of voluntary testing in the Koulikoro region are far from gold-bearing  
33 zones, especially the IASGM site of Kokoyo. This community-based research identified a large  
34 number of new HIV positive cases, and this is another important contribution of the study. More  
35 specifically, 38% of the 18 HIV-positive participants in the quantitative survey were newly diagnosed  
36 using ARCAD-SIDA's rapid tests. Five out of 11 positive cases in women were new diagnoses,  
37 especially female street vendors. Although ARCAD-SIDA referred all 18 HIV positive participants to  
38 the nearest regional hospitals (CSREF) in order to link them to care, the emerging question is whether  
39 or not these participants subsequently initiated and adhered to antiretroviral treatment given the  
40 distance of more than 100km between Kokoyo and Kangaba city where the CSREF is located.  
41 Unfortunately, we have no information about lost-to-follow-up rates in people living with HIV in the  
42 context of IASGM sites, but presumably these rates are high given that HIV is not of primary concern  
43 to people in IASGM sites, as suggested by Campbell<sup>3</sup>. This certainly seems to be the situation in  
44 Kokoyo, where the large majority of study participants aware of HIV (over 90%) had never previously  
45 gone for a test (63.4%). Multivariate analyses indicated that female non sex-workers, the eldest  
46  
47  
48  
49  
50  
51  
52  
53  
54  
55  
56  
57  
58  
59  
60



1  
2  
3 participants, and those with poor self-perceived health status were the three sub-populations most  
4 associated with HIV seropositivity.  
5

6  
7 Some limitations should be acknowledged. First, the study sample is not representative of the whole  
8 population in IASGM sites in Mali. However, our results reflect those in the literature. Second, the  
9 cross-sectional design of the Sanu Gundo survey did not enable us to analyse changes over time  
10 concerning different aspects, such as living and working conditions, seasonal mobility, and sexual  
11 behaviour. Furthermore, although the participants who tested positive for HIV during the study were  
12 referred to the regional hospital, the design of the survey did not allow us collect subsequent  
13 information, either concerning linkage-to-care or antiretroviral treatment initiation. Finally, there is a  
14 possibility of selection bias, as the sample was drawn from the healthcare conversation audience  
15 organized by ARCAD-SIDA. Nevertheless, any selection bias would reflect an audience mainly  
16 comprising individuals interested in prevention and to some extent, worried about health issues,  
17 especially HIV. One would expect that any future study whose design were to attract participants  
18 other than those already interested in health care, would result in higher HIV prevalence being  
19 measured and would accentuate the precarious characteristics already described by our survey at  
20 Kokoyo. Despite these limitations, our study contributes to the existing literature by creating a  
21 knowledge base which could be a useful first step for the development of suitable surveys and  
22 interventions.  
23  
24  
25  
26  
27  
28  
29  
30  
31  
32

### 33 **Conclusion**

34  
35 The results of this study demonstrate the importance of focusing on different categories of workers  
36 and the necessity to conduct further similar research on other Malian IASGM sites, in order to  
37 account for structural and geographical heterogeneity. The present article contributes to the  
38 literature by reopening the debate about the impact of health issues on IASGM activities, especially  
39 HIV issues, in a context where the sustained spread of this disease could not only harm efforts in the  
40 fight against AIDS, but also have important negative consequences on one of the main cornerstones  
41 of the Malian economy. Integrated policy-making should pay special attention to infectious diseases  
42 among populations in IASGM zones. Bringing information/prevention activities closer to people  
43 working in gold-bearing zones is an urgent public health action.  
44  
45  
46  
47  
48  
49  
50  
51  
52

### 53 **Authors' contribution**

54  
55  
56  
57  
58  
59  
60

1  
2  
3 LST designed and led the study and wrote the first draft of the report. LST, MSM, BS and BDK  
4 designed the analysis. LST, HB and FD analysed the data. MM and MB oversaw data management. All  
5 authors critically reviewed and approved the manuscript.  
6  
7  
8  
9  
10

## 11 12 13 References

- 14  
15 1. A Simple Public Health Strategy for ASGM - Artisanal Gold Council. (2014). Available  
16 at: <http://www.artisanalgold.org/publications/articles/a-simple-public-health-strategy-for->  
17  
18 [asgm](http://www.artisanalgold.org/publications/articles/a-simple-public-health-strategy-for-). (Accessed: 28th August 2016)  
19  
20
- 21  
22 2. Desmond, N. *et al.* A typology of groups at risk of HIV/STI in a gold mining town in  
23 north-western Tanzania. *Soc. Sci. Med.* **60**, 1739–1749 (2005).  
24  
25
- 26  
27 3. Campbell, C. Migrancy, masculine identities and AIDS: the psychosocial context of HIV  
28 transmission on the South African gold mines. *Soc. Sci. Med.* **45**, 273–281 (1997).  
29  
30
- 31  
32 4. Cates, W. J. & Dallabetta, G. The staying power of sexually transmitted diseases. *The*  
33 *Lancet* **354 (S4)**, (1999).  
34
- 35  
36 5. Jokonya, O. Towards a Big Data Framework for the Prevention and Control of  
37 HIV/AIDS, TB and Silicosis in the Mining Industry. *Procedia Technol.* **16**, 1533–1541  
38 (2014).  
39  
40
- 41  
42 6. Kiš, A. D. ABC for AIDS prevention in Guinea: migrant gold mining communities  
43 address their risks. *AIDS Care* **22**, 520–525 (2010).  
44  
45
- 46  
47 7. Day, J. H. *et al.* Attitudes to HIV voluntary counselling and testing among mineworkers  
48 in South Africa: Will availability of antiretroviral therapy encourage testing? *AIDS Care*  
49 **15**, 665–672 (2003).  
50  
51
- 52  
53 8. Sikasote, J., Grant, L., Chinn, D. J., Macwang'i, M. & Murray, S. A. Voluntary  
54 counselling and testing for HIV in a Zambian mining community: serial interviews with  
55 people testing negative. *Sex. Transm. Infect.* **87**, 433–438 (2011).  
56  
57  
58  
59  
60

- 1  
2  
3 9. Lightfoot, E., Maree, M. & Ananias, J. Exploring the relationship between HIV and  
4 alcohol use in a remote Namibian mining community. *Afr. J. AIDS Res.* **8**, 321–327  
5  
6 (2009).  
7  
8
- 9  
10 10. Siu, G. E., Seeley, J. & Wight, D. Dividuality, masculine respectability and reputation:  
11 How masculinity affects men's uptake of HIV treatment in rural eastern Uganda. *Soc. Sci.*  
12 *Med.* **89**, 45–52 (2013).  
13  
14
- 15  
16 11. Siu, G. E., Wight, D. & Seeley, J. How a masculine work ethic and economic  
17 circumstances affect uptake of HIV treatment: experiences of men from an artisanal gold  
18 mining community in rural eastern Uganda. *J. Int. AIDS Soc.* **15**, (2012).  
19  
20  
21  
22
- 23 12. Rees, D., Murray, J., Nelson, G. & Sonnenberg, P. Oscillating migration and the  
24 epidemics of silicosis, tuberculosis, and HIV infection in South African gold miners. *Am.*  
25 *J. Ind. Med.* **53**, 398–404 (2009).  
26  
27  
28
- 29 13. Stevens, W., Apostolellis, A., Napier, G., Scott, L. & Gresak, G. HIV/AIDS prevalence  
30 testing-merits, methodology and outcomes of a survey conducted at a large mining  
31 organisation in South Africa. *S. Afr. Med. J.* **96**, 134 (2008).  
32  
33  
34  
35
- 36 14. Diallo, B.-L., Alary, M., Rashed, S. & Barry, A. Épidémie du VIH chez les hommes  
37 travaillant dans les mines industrielles de Guinée : séroprévalence, facteurs de risque  
38 associés et tendance 2001–2007. *Rev. D'Épidémiologie Santé Publique* **59**, 251–257  
39  
40  
41  
42  
43  
44
- 45 15. Palmer, C. J. *et al.* HIV prevalence in a gold mining camp in the Amazon region, Guyana.  
46  
47 (2002).  
48
- 49 16. Clift, S. *et al.* Variations of HIV and STI prevalences within communities neighbouring  
50 new goldmines in Tanzania: importance for intervention design. *Sex. Transm. Infect.* **79**,  
51  
52  
53  
54  
55  
56  
57  
58  
59  
60

17. Traore, M. Some critical reflections on the future of gold mining in Mali. *Extr. Ind. Soc.* **3**, 367–369 (2016).
18. Bastagli, F., Toulmin, C., European Parliament & Directorate-General for External Policies of the Union. *Mali, the economic factors behind the crisis*. (Publications Office, 2014).
19. *Initiative pour la transparence dans les industries extractives ITIE-Mali: Rapport ITIE pour l'année 2013*. (2013).
20. Keita, S. Study on artisanal and small-scale mining in Mali. *Min. Miner. Sustain. Dev. MMSD Work. Pap.* **80**, (2001).
21. Hilson, G. & McQuilken, J. Four decades of support for artisanal and small-scale mining in sub-Saharan Africa: A critical review. *Extr. Ind. Soc.* **1**, 104–118 (2014).
22. Buxton, A. Responding to the challenge of artisanal and small-scale mining. *Can Knowl. Netw. Help* (2013).
23. Teschner, B. A. “Orpaillage pays for everything”: How artisanal mining supported rural institutions following Mali’s coup d’état. *Futures* **62**, 140–150 (2014).
24. Verbrugge, B. Voices from below: Artisanal- and small-scale mining as a product and catalyst of rural transformation. *J. Rural Stud.* **47**, 108–116 (2016).
25. Onukwugha, E., Bergtold, J. & Jain, R. A Primer on Marginal Effects—Part I: Theory and Formulae. *PharmacoEconomics* **33**, 25–30 (2015).
26. Onukwugha, E., Bergtold, J. & Jain, R. A Primer on Marginal Effects—Part II: Health Services Research Applications. *PharmacoEconomics* **33**, 97–103 (2015).
27. Greene, W. H. *Econometric Analysis*. (Pearson Prentice Hall, 1997).
28. R Core Team. *R: A language and environment for statistical computing. R Foundation for Statistical Computing*. (2016).

- 1  
2  
3 29. Ratio de la population pauvre en fonction du seuil de pauvreté national (% de la  
4 population rurale) | Data. Available at:  
5  
6  
7 <http://donnees.banquemondiale.org/indicateur/SI.POV.RUHC?locations=ML>. (Accessed:  
8  
9 22nd August 2016)  
10  
11 30. Yakovleva, N. Perspectives on female participation in artisanal and small-scale mining: A  
12 case study of Birim North District of Ghana. *Resour. Policy* **32**, 29–41 (2007).  
13  
14 31. Bellaby, P. To risk or not to risk? Uses and limitations of Mary Douglas on risk  
15 acceptability for understanding health and safety at work and road accidents. *Sociol. Rev.*  
16  
17 **38**, 465–483 (1990).  
18  
19 32. Mali | UNAIDS. Available at: <http://www.unaids.org/en/regionscountries/countries/mali>.  
20  
21 (Accessed: 22nd August 2016)  
22  
23 33. *Focus sur Bantako, zone d'orpaillage traditionnelle: La vulnérabilité au VIH dans les*  
24  
25 *zones d'orpaillages traditionnelles*. (2009).  
26  
27 34. *Programme d'appui au monde associatif et communautaire (PAMAC): pour la période*  
28  
29 *2011-2015*. (2011).  
30  
31  
32  
33  
34  
35  
36  
37

38 **Competing statement: Authors declare no conflict of interest**

39  
40 **Data sharing statement:**

41  
42 Full dataset and statistical code available from the corresponding author [luis.sagaon-teyssier@inserm.fr](mailto:luis.sagaon-teyssier@inserm.fr) The  
43 presented data are anonymized and risk of identification is null.  
44  
45  
46  
47  
48  
49  
50  
51  
52  
53  
54  
55  
56  
57  
58  
59  
60

STROBE 2007 (v4) Statement—Checklist of items that should be included in reports of *cross-sectional studies*

| Section/Topic                | Item # | Recommendation                                                                                                                                                                       | Reported on page # |
|------------------------------|--------|--------------------------------------------------------------------------------------------------------------------------------------------------------------------------------------|--------------------|
| Title and abstract           | 1      | (a) Indicate the study's design with a commonly used term in the title or the abstract                                                                                               | 1                  |
|                              |        | (b) Provide in the abstract an informative and balanced summary of what was done and what was found                                                                                  | 2                  |
| <b>Introduction</b>          |        |                                                                                                                                                                                      |                    |
| Background/rationale         | 2      | Explain the scientific background and rationale for the investigation being reported                                                                                                 | 2-3                |
| Objectives                   | 3      | State specific objectives, including any prespecified hypotheses                                                                                                                     | 3                  |
| <b>Methods</b>               |        |                                                                                                                                                                                      |                    |
| Study design                 | 4      | Present key elements of study design early in the paper                                                                                                                              | 4                  |
| Setting                      | 5      | Describe the setting, locations, and relevant dates, including periods of recruitment, exposure, follow-up, and data collection                                                      | 4                  |
| Participants                 | 6      | (a) Give the eligibility criteria, and the sources and methods of selection of participants                                                                                          | 4                  |
| Variables                    | 7      | Clearly define all outcomes, exposures, predictors, potential confounders, and effect modifiers. Give diagnostic criteria, if applicable                                             | 4                  |
| Data sources/<br>measurement | 8*     | For each variable of interest, give sources of data and details of methods of assessment (measurement). Describe comparability of assessment methods if there is more than one group | NA                 |
| Bias                         | 9      | Describe any efforts to address potential sources of bias                                                                                                                            | 4                  |
| Study size                   | 10     | Explain how the study size was arrived at                                                                                                                                            | 4                  |
| Quantitative variables       | 11     | Explain how quantitative variables were handled in the analyses. If applicable, describe which groupings were chosen and why                                                         | 4                  |
| Statistical methods          | 12     | (a) Describe all statistical methods, including those used to control for confounding                                                                                                | 4                  |
|                              |        | (b) Describe any methods used to examine subgroups and interactions                                                                                                                  | NA                 |
|                              |        | (c) Explain how missing data were addressed                                                                                                                                          | NA                 |
|                              |        | (d) If applicable, describe analytical methods taking account of sampling strategy                                                                                                   | NA                 |
|                              |        | (e) Describe any sensitivity analyses                                                                                                                                                | NA                 |
| <b>Results</b>               |        |                                                                                                                                                                                      |                    |

|                          |     |                                                                                                                                                                                                              |    |
|--------------------------|-----|--------------------------------------------------------------------------------------------------------------------------------------------------------------------------------------------------------------|----|
| Participants             | 13* | (a) Report numbers of individuals at each stage of study—eg numbers potentially eligible, examined for eligibility, confirmed eligible, included in the study, completing follow-up, and analysed            | NA |
|                          |     | (b) Give reasons for non-participation at each stage                                                                                                                                                         | NA |
|                          |     | (c) Consider use of a flow diagram                                                                                                                                                                           | NA |
| Descriptive data         | 14* | (a) Give characteristics of study participants (eg demographic, clinical, social) and information on exposures and potential confounders                                                                     | 5  |
|                          |     | (b) Indicate number of participants with missing data for each variable of interest                                                                                                                          | NA |
| Outcome data             | 15* | Report numbers of outcome events or summary measures                                                                                                                                                         | 6  |
| Main results             | 16  | (a) Give unadjusted estimates and, if applicable, confounder-adjusted estimates and their precision (eg, 95% confidence interval). Make clear which confounders were adjusted for and why they were included | 7  |
|                          |     | (b) Report category boundaries when continuous variables were categorized                                                                                                                                    | 7  |
|                          |     | (c) If relevant, consider translating estimates of relative risk into absolute risk for a meaningful time period                                                                                             | NA |
| Other analyses           | 17  | Report other analyses done—eg analyses of subgroups and interactions, and sensitivity analyses                                                                                                               | NA |
| <b>Discussion</b>        |     |                                                                                                                                                                                                              |    |
| Key results              | 18  | Summarise key results with reference to study objectives                                                                                                                                                     | 8  |
| Limitations              | 19  | Discuss limitations of the study, taking into account sources of potential bias or imprecision. Discuss both direction and magnitude of any potential bias                                                   | 10 |
| Interpretation           | 20  | Give a cautious overall interpretation of results considering objectives, limitations, multiplicity of analyses, results from similar studies, and other relevant evidence                                   | 10 |
| Generalisability         | 21  | Discuss the generalisability (external validity) of the study results                                                                                                                                        | 10 |
| <b>Other information</b> |     |                                                                                                                                                                                                              |    |
| Funding                  | 22  | Give the source of funding and the role of the funders for the present study and, if applicable, for the original study on which the present article is based                                                |    |

\*Give information separately for cases and controls in case-control studies and, if applicable, for exposed and unexposed groups in cohort and cross-sectional studies.

**Note:** An Explanation and Elaboration article discusses each checklist item and gives methodological background and published examples of transparent reporting. The STROBE checklist is best used in conjunction with this article (freely available on the Web sites of PLoS Medicine at <http://www.plosmedicine.org/>, Annals of Internal Medicine at <http://www.annals.org/>, and Epidemiology at <http://www.epidem.com/>). Information on the STROBE Initiative is available at [www.strobe-statement.org](http://www.strobe-statement.org).

# BMJ Open

**Prevalence of HIV at the Kokoyo informal gold mining site:  
What lies behind the glitter of gold with regard to HIV  
epidemics in Mali? A community-based approach (The  
ANRS-12339 Sanu Gundo cross-sectional survey)**

|                                 |                                                                                                                                                                                                                                                                                                                                                                                                                                                                                                                                                                                                                                                                                                                                                                                                                                                                                                                                                                                                                                                                                                                                                                                                                                                                                                                                                                                                                                                                                                                                                                                                                              |
|---------------------------------|------------------------------------------------------------------------------------------------------------------------------------------------------------------------------------------------------------------------------------------------------------------------------------------------------------------------------------------------------------------------------------------------------------------------------------------------------------------------------------------------------------------------------------------------------------------------------------------------------------------------------------------------------------------------------------------------------------------------------------------------------------------------------------------------------------------------------------------------------------------------------------------------------------------------------------------------------------------------------------------------------------------------------------------------------------------------------------------------------------------------------------------------------------------------------------------------------------------------------------------------------------------------------------------------------------------------------------------------------------------------------------------------------------------------------------------------------------------------------------------------------------------------------------------------------------------------------------------------------------------------------|
| Journal:                        | <i>BMJ Open</i>                                                                                                                                                                                                                                                                                                                                                                                                                                                                                                                                                                                                                                                                                                                                                                                                                                                                                                                                                                                                                                                                                                                                                                                                                                                                                                                                                                                                                                                                                                                                                                                                              |
| Manuscript ID                   | bmjopen-2017-016558.R2                                                                                                                                                                                                                                                                                                                                                                                                                                                                                                                                                                                                                                                                                                                                                                                                                                                                                                                                                                                                                                                                                                                                                                                                                                                                                                                                                                                                                                                                                                                                                                                                       |
| Article Type:                   | Research                                                                                                                                                                                                                                                                                                                                                                                                                                                                                                                                                                                                                                                                                                                                                                                                                                                                                                                                                                                                                                                                                                                                                                                                                                                                                                                                                                                                                                                                                                                                                                                                                     |
| Date Submitted by the Author:   | 15-Jun-2017                                                                                                                                                                                                                                                                                                                                                                                                                                                                                                                                                                                                                                                                                                                                                                                                                                                                                                                                                                                                                                                                                                                                                                                                                                                                                                                                                                                                                                                                                                                                                                                                                  |
| Complete List of Authors:       | <p>Sagaon-Teyssier, Luis; Aix Marseille Univ, INSERM, IRD, SESSTIM, Sciences Economiques &amp; Sociales de la Santé &amp; Traitement de l'Information Médicale, ; ORS PACA, Observatoire régional de la santé Provence-Alpes-Côte d'Azur,</p> <p>Balique, Hubert; Aix-Marseille Université Faculté de Médecine, Research unit EA 3279 : Public Health, Chronic Diseases and Quality of Life; ORS PACA, Observatoire régional de la santé Provence-Alpes-Côte d'Azur,</p> <p>Diallo, Fodié; ARCAD SIDA</p> <p>Kalampalikis, Nikos; University Lyon 2, Institute of Psychology, Social Psychology Research Group (EA 4163)</p> <p>Mora, Marion; Aix Marseille Univ, INSERM, IRD, SESSTIM, Sciences Economiques &amp; Sociales de la Santé &amp; Traitement de l'Information Médicale; ORS PACA, Observatoire régional de la santé Provence-Alpes-Côte d'Azur,</p> <p>Bourrelly, Michel; Aix Marseille Univ, INSERM, IRD, SESSTIM, Sciences Economiques &amp; Sociales de la Santé &amp; Traitement de l'Information Médicale; ORS PACA, Observatoire régional de la santé Provence-Alpes-Côte d'Azur,</p> <p>Suzan-Monti, Marie; Aix Marseille Univ, INSERM, IRD, SESSTIM, Sciences Economiques &amp; Sociales de la Santé &amp; Traitement de l'Information Médicale; ORS PACA, Observatoire régional de la santé Provence-Alpes-Côte d'Azur,</p> <p>Spire, Bruno; Aix Marseille Univ, INSERM, IRD, SESSTIM, Sciences Economiques &amp; Sociales de la Santé &amp; Traitement de l'Information Médicale; ORS PACA, Observatoire régional de la santé Provence-Alpes-Côte d'Azur,</p> <p>Dembélé Keita, Bintou; ARCAD SIDA</p> |
| <b>Primary Subject Heading</b>: | Health policy                                                                                                                                                                                                                                                                                                                                                                                                                                                                                                                                                                                                                                                                                                                                                                                                                                                                                                                                                                                                                                                                                                                                                                                                                                                                                                                                                                                                                                                                                                                                                                                                                |
| Secondary Subject Heading:      | Epidemiology, HIV/AIDS                                                                                                                                                                                                                                                                                                                                                                                                                                                                                                                                                                                                                                                                                                                                                                                                                                                                                                                                                                                                                                                                                                                                                                                                                                                                                                                                                                                                                                                                                                                                                                                                       |
| Keywords:                       | HIV & AIDS < INFECTIOUS DISEASES, EPIDEMIOLOGY, Health policy < HEALTH SERVICES ADMINISTRATION & MANAGEMENT, PUBLIC HEALTH                                                                                                                                                                                                                                                                                                                                                                                                                                                                                                                                                                                                                                                                                                                                                                                                                                                                                                                                                                                                                                                                                                                                                                                                                                                                                                                                                                                                                                                                                                   |
|                                 |                                                                                                                                                                                                                                                                                                                                                                                                                                                                                                                                                                                                                                                                                                                                                                                                                                                                                                                                                                                                                                                                                                                                                                                                                                                                                                                                                                                                                                                                                                                                                                                                                              |



1  
2  
3  
4  
5  
6  
7  
8  
9  
10  
11  
12  
13  
14  
15  
16  
17  
18  
19  
20  
21  
22  
23  
24  
25  
26  
27  
28  
29  
30  
31  
32  
33  
34  
35  
36  
37  
38  
39  
40  
41  
42  
43  
44  
45  
46  
47  
48  
49  
50  
51  
52  
53  
54  
55  
56  
57  
58  
59  
60

SCHOLARONE™  
Manuscripts

For peer review only

1  
2  
3 **Prevalence of HIV at the Kokoyo informal gold mining site: What lies behind the glitter of gold with**  
4 **regard to HIV epidemics in Mali? A community-based approach (The ANRS-12339 Sanu Gundo**  
5 **cross-sectional survey)**  
6

7 Luis Sagaon-Teyssier<sup>1,2,\*</sup>, Hubert Baliq<sup>2</sup>, Fodié Diallo<sup>3</sup>, Nikos Kalampalikis<sup>4</sup>, Marion Mora<sup>1,2</sup>, Michel  
8 Bourrelly<sup>1,2</sup>, Marie Suzan-Monti<sup>1,2</sup>, Bruno Spire<sup>1,2</sup>, Bintou Dembélé Keita<sup>3</sup>  
9

10  
11  
12 <sup>1</sup>Aix Marseille Univ, INSERM, IRD, SESSTIM, Sciences Economiques & Sociales de la Santé & Traitement de  
13 l'Information Médicale, Marseille, France.

14  
15 <sup>2</sup>ORS PACA, Observatoire régional de la santé Provence-Alpes-Côte d'Azur, Marseille, France.

16  
17 <sup>3</sup>ARCAD SIDA, Bamako, Mali.

18  
19 <sup>4</sup>University Lyon 2, Institute of Psychology, Social Psychology Research Group (EA 4163), 5  
20 avenue P. Mendès-France, 69676 Bron, France.

21  
22 \*Corresponding author: Luis Sagaon-Teyssier (luis.sagaon-teyssier@inserm.fr)  
23 Address : Faculté de Médecine, 27 Bd Jean Moulin, 13385 Marseille cedex 5 France  
24 Telephone: +33 4 13 73 22 77  
25

26  
27 **Funding**

28  
29 The Sanu Gundo survey was sponsored and funded by the French National Agency for Research on Aids and  
30 Viral Hepatitis (ANRS) grant ANRS-12339 Sanu Gundo.  
31  
32

33  
34 **Abstract**

35  
36 **Objectives:** The aim of this article was to estimate HIV prevalence and the factors associated with  
37 HIV seropositivity in the population living and working at the informal artisanal small-scale gold  
38 mining (IASGM) site of Kokoyo in Mali, using data from the Sanu Gundo survey. Our main hypothesis  
39 was that HIV prevalence is higher in the context of IASGM than in the country as a whole.  
40  
41

42  
43 **Design:** The ANRS-12339 Sanu Gundo was a cross-sectional survey conducted in December 2015. The  
44 quantitative survey consisted in face-to-face administration of questionnaires. Five focus groups  
45 were conducted for the qualitative survey. HIV prevalence was calculated for the sample, and  
46 according to the type of activity performed in IASGM.  
47  
48

49  
50 **Settings:** The informal artisanal small-scale gold mining site of Kokoyo, one of the largest sites in Mali  
51 (between 6000 and 1000 people).  
52

53  
54 **Participants:** 224 respondents: 37.5% were gold-diggers, 33% retail traders, 6.7% *tombolomas* (i.e.  
55 traditional guards), and 9% female sex-workers. The remaining 13.8% reported another activity  
56 (mainly street vending).  
57  
58  
59  
60

1  
2  
3 **Primary and secondary outcome measures:** HIV prevalence and HIV prevalence according to sub-  
4 group, as defined by their activity at the Kokoyo IASGM. A Probit logistic regression was  
5 implemented to estimate the characteristics associated with HIV seropositivity.  
6  
7

8 **Results:** HIV prevalence for the total sample was 8% 95%CI[7.7%-8.3%], which is much higher than  
9 the 2015 national prevalence of 1.3% (UNAIDS). The probability of HIV seropositivity was 7.8%  
10 (p=0.037) higher for female non sex-workers than for any other category, and this probability  
11 increased significantly with age. Qualitative data revealed the non-systematic use of condoms with  
12 sex-workers; and long distance from health services was the main barrier to accessing care.  
13  
14

15 **Conclusions:** Integrated policy-making should pay special attention to infectious diseases among  
16 populations in IASGM zones. Bringing information/prevention activities closer to people working in  
17 gold-mining zones is an urgent public health action.  
18  
19

#### 20 **Strengths and limitations of this study**

- 21 - This is the first study conducted in an informal and artisanal small-scale gold mining site in  
22 Mali including all of the people directly or indirectly involved in the site's activities.
- 23 - This study was implemented using a community-based research approach, the survey design  
24 and research questions being developed in collaboration with representatives of the mine of  
25 Kokoyo.
- 26 - The highest HIV prevalence was found among female non sex-workers (13%), which  
27 highlights the importance of focusing on high-risk less-studied populations.
- 28 - A large proportion of participants in the survey had never had a HIV test, which highlights the  
29 importance of "close proximity health services"
- 30 - The cross-sectional design of the Sanu Gundo survey did not enable us to analyse changes  
31 over time concerning several socio-economic and behavioural aspects, such as living and  
32 working conditions, seasonal mobility, or sexual behaviour

#### 33 **Introduction**

34 The poverty-driven activities and demographic conditions in the world's informal artisanal small-scale  
35 gold mining (IASGM) sector contribute to its vulnerability to infectious diseases including HIV. This  
36 disease is recognized as one of the main public health issues in this sector, and potentially concerns  
37 almost 15 million people involved in IASGM activities across 70 countries<sup>1</sup>. Despite the high risk of  
38 transmission<sup>2,3</sup>, and sustained spread of the disease<sup>4,5</sup>, very little is known about HIV epidemics in  
39 IASGM sites. Existing HIV literature on people working and living in gold mining sites mainly focuses  
40 on behavioural aspects, such as prevention<sup>6</sup>, attitudes towards voluntary counselling and testing<sup>7,8</sup>,  
41  
42  
43  
44  
45  
46  
47  
48  
49  
50  
51  
52  
53  
54  
55  
56  
57  
58  
59  
60

1  
2  
3 the link between alcohol consumption and HIV<sup>9</sup>, and the role of gender in the fight against HIV<sup>3,10,11</sup>.  
4 Furthermore, most studies have either been conducted among workers in industrial gold mines or in  
5 mining communities near gold-bearing zones which are not exclusively related to the IASGM sector.  
6 This is also the case of the few studies examining HIV prevalence, which in South Africa in the last  
7 decade was measured at approximately 25%<sup>3,12,13</sup>, at 22.3% for a group of Mozambican gold miners  
8 in 2012, and at 4.5% and 6.4% for Guinea in 2001 and 2007, respectively<sup>14</sup>. We found only one study  
9 concerning an IASGM site, specifically in the Amazon region of Guyana. HIV prevalence there was  
10 6.5%<sup>15</sup>. In addition, these studies principally focus on gold miners themselves and/or other  
11 presupposed most-at-risk groups (e.g. female sex-workers), with little attention given to other  
12 categories of potentially high-risk people such as gold diggers (i.e. miners working in the informal  
13 sector), women who are not sex-workers, and street vendors, all of whom play an important role in  
14 the transmission and/or mobility of HIV. Indeed, focusing only on gold miners and not including these  
15 other high-risk groups may be detrimental to the fight against HIV<sup>2</sup>, as demonstrated by Clift *et al.*<sup>16</sup>  
16 in a community near two industrial gold-mines in Tanzania, where HIV prevalence was lower in mine  
17 workers (6%) than in men and women living at the mines but not directly involved in mining  
18 (respectively, 16% and 18%).  
19

20  
21 Gold mining is one of the cornerstones of the Malian economy, representing almost 70% of the  
22 country's total exports and 8% of the GDP in 2013<sup>17-19</sup>. Between 200 000 and 400 000 persons are  
23 estimated to be directly concerned by IASGM activities<sup>20,21</sup>. Despite the economic importance of the  
24 sector, little attention has been paid to health, as demonstrated by both the poor medical services  
25 provided in these sites<sup>22,23</sup> and the increasing demand for health, especially concerning HIV. The high  
26 prevalence observed in some key populations provides a picture of the situation people may face in  
27 these sites. A demographic and health survey (EDSMV) conducted in Mali in 2012 showed that HIV  
28 prevalence among female sex-workers (24.2%), female street vendors (3.7%), and truckers (2.7%)  
29 was much higher than the national prevalence of approximately 1.2% in the same year. Different  
30 reports on IASGM in Mali have highlighted the urgent need to include the health dimension in  
31 economic-based research programs, especially concerning HIV. Community-based activities (e.g.,  
32 prevention, screening, counselling etc.) could help do this as they could help provide a greater  
33 understanding of the heterogeneity of IASGM, the functioning of this informal labour market<sup>2,24</sup>, and  
34 the impact of IASGM sector on the transmission and spread of infectious diseases.  
35

36  
37 We conducted the ANRS-12339 Sanu Gundo survey of the IASGM site at Kokoyo in Mali's Koulikoro  
38 region in December 2015, using a community-based research approach. The objective of this article  
39 was to estimate HIV prevalence - using the Sanu Gundo survey - in different groups present at  
40 Kokoyo, and the factors associated with HIV seropositivity.  
41  
42  
43  
44  
45  
46  
47  
48  
49  
50  
51  
52  
53  
54  
55  
56  
57  
58  
59  
60

## Methods

### *Design and settings*

The ANRS-12339 Sanu Gundo cross-sectional survey was conducted in December 2015 at Kokoyo (for 2 weeks), one of the largest IASGM sites in Mali with a population oscillating between 6 000 and 10 000 people, depending on the season (rainy/dry). In collaboration with the Chamber of Mines and the Mines Ministry, this site was chosen for its geographical location because of the great deal of cultural heterogeneity there. People come not only from other Malian regions, but also from neighbouring countries (Burkina Faso, Guinea, Nigeria, and Niger). All procedures and documents used were validated by both French (CCTIRS N°15.917) and Malian (N°2015/65/CE/FMPOS) ethics committees.

The study started with conversations about global health topics with a focus on HIV/STI prevention which were facilitated by ARCAD-SIDA members. Participants in the conversations were informed about the community-based services provided by the mobile ARCAD-SIDA unit, including the provision of a medical check-up and essential medicines including those for treating STI. Furthermore, ARCAD-SIDA proposed rapid tests for HIV and invited people to take part in the survey. For HIV screening, ARCAD-SIDA follows the Malian Ministry of Health recommendations using Determine® rapid tests, and ImmunoComb® II for confirmation. ARCAD-SIDA provided counselling about the importance of being treated to participants testing HIV positive, and referred them to regional health care centres (Centre de Santé de Référence, CSREF) for blood assessment and inclusion in treatment and follow-up programmes.

Participants in the conversations were then invited to participate in the qualitative and quantitative surveys (they could choose either or both) which formed the basis for the ANRS-12339 Sanu Gundo survey. Community-based agents sent those interested to the Malian team of researchers, who in turn provided detailed information about the content of the survey, its main objectives, and the advantages/risks of participating in this kind of survey. Survey participants provided written formal consent to participate in the survey(s) by signing a letter of consent.

### *Participants*

Eligibility criteria included: i) aged 18 years or older; ii) able to speak French, Bambara, or English; iii) able to provide written consent to participate. Persons under the effects of alcohol and/or drugs

1  
2  
3 were excluded. For the *quantitative survey*, 224 participants constituted the convenience sample. In  
4 order to reduce any potential over-representation and under-representation sampling bias, ARCAD-  
5 SIDA activities were conducted every day at different time slots and locations at the site in order to  
6 adapt participant recruitment to the work schedule of the different categories of people living there.  
7 To those who agreed to participate in the survey(s), a brief face-to-face questionnaire was  
8 administered by trained investigators who collected information about the following : i)  
9 sociodemographic and socioeconomic characteristics: age (continuous variable), gender, marital  
10 status, country of residence, educational level, and weekly earnings (dichotomized at the median of  
11 14 500 FCFA, approximately 24.26 US\$ ) ; ii) type of activity and mobility between sites; iii) HIV  
12 awareness, assessed with the following questions: “Have you heard about HIV?” “Have you ever  
13 been tested for HIV before today?”, “Do you know your HIV status?”; iv) risky behaviours: alcohol  
14 and drugs consumption, sexual self-definition, type(s) and frequency of intercourse; v) perceived  
15 health status, assessed with the following question: “How do you consider your state of health  
16 today?”, with possible answers including “very poor”, “poor”, “moderate”, “good”, and “very good”.  
17 This variable was equal to 1 for those perceiving their health was good or very good, and 0 for those  
18 perceiving they had poor or very poor health. For the *qualitative survey*, purposive sampling was  
19 implemented. This seemed to be the most suitable sampling method as the main objective of the  
20 qualitative survey was to collect information about prevention and access to care for HIV/STI among  
21 specific groups. The sample size for each group was fixed between 5 and 8 survey participants in  
22 order to ensure diversity among them. Five activity-specific focus groups were organized: Malian  
23 gold-diggers, Non-Malian gold-diggers, female sex-workers, female non sex-workers, and people  
24 guaranteeing the organizational functioning at the gold mine site (*damantiguis* and *tombolomas*).  
25  
26  
27  
28  
29  
30  
31  
32  
33  
34  
35  
36  
37  
38  
39  
40  
41

### 42 **Statistical analyses**

43  
44 The sample was described and HIV prevalence calculated both for the overall sample, and for the  
45 different sub-groups listed above (i.e., according to the type of activity in the gold mining site). A  
46 Probit logistic regression was implemented to estimate the characteristics associated with the  
47 probability of HIV seropositivity. Given the nature of the normal distribution assumption of the error  
48 term in the Probit estimation, coefficients are not affected by the presence of extreme values in  
49 independent variables. Furthermore, Probit regression allows the computation of marginal effects  
50 that are more flexible and more informative than odd-ratios<sup>25,26</sup> which tend to be larger in the  
51 presence of rare events and are in any case preferred for small samples<sup>27</sup>. Marginal effects,  $dF/dX$ ,  
52 are interpreted as instantaneous rates of change: for a dichotomous explanatory variable, a marginal  
53  
54  
55  
56  
57  
58  
59  
60

1  
2  
3 effect shows how predicted probabilities change when the variable changes from 0 to 1. All statistical  
4 analyses were performed using R software<sup>28</sup>.  
5  
6  
7

### 8 9 ***Qualitative data analysis***

10  
11 Focus groups were audio-recorded and transcribed. The principle of thematic encoding developed by  
12 Flick<sup>29</sup> for the analysis of interviews was applied as for other studies with focus groups<sup>30</sup>. Therefore,  
13 thematic and pragmatic dimensions were combined into a dialogical unit to highlight patterns  
14 specific to the different groups. Lexical analysis was carried out using both Alceste and MAXQDA  
15 software. The different dimensions were cross-classified to generate new insights about the  
16 organisation of the data (i.e. how common themes are linked together, specific interactions intra-  
17 and inter-groups, etc.).  
18  
19  
20  
21  
22  
23  
24

## 25 26 **Results**

### 27 28 ***Sample characteristics***

29  
30 The quantitative survey was conducted on a convenience sample of 224 participants interested in  
31 prevention and medical activities provided by ARCAD-SIDA (Table 1): 101 women (45.1%) and 123  
32 men (54.9%). There was a significant difference in average age between both genders: 25 and 29  
33 years old respectively. With respect to participants' main residence, 133 (59.4%) declared they lived  
34 in Mali: 28.5% in Kokoyo (i.e. autochthonous) and 71.5% from different cities (i.e. non-  
35 autochthonous) including Danga (the nearest) and Timbuktu (the farthest). The remaining 91  
36 participants (40.6%) declared another country as their principal place of residence. With respect to  
37 marital status, 158 participants (70.5% of the whole sample) declared they were married or lived in a  
38 couple. Among them, 50.6% lived with their spouse in Kokoyo and the remaining 49.4% were  
39 geographically single. Of the 86 married/in a couple males who did not live with their spouse in  
40 Kokoyo 72.1% declared living with another partner at the site. Conversely, the proportion of  
41 geographically single women was only 22.2% among the sample's 72 married/in-a-couple females,  
42 and none declared having another partner at the site. Socio-economic difficulties were observed in  
43 terms of educational level, with 49.1% of the 224 participants reporting they had never been to  
44 school. Among the others, 27.7% and 9.8% had, respectively, a primary and secondary school  
45 educational level, 12.1% had a Koranic educational background, and 1.3% declared having post-  
46 secondary school education. With respect to their activity in Kokoyo, among the 224 respondents  
47 37.5% were gold-diggers, 33% retail traders, 6.7% *tombolomas*, 9% female sex-workers, while 14%  
48  
49  
50  
51  
52  
53  
54  
55  
56  
57  
58  
59  
60

reported another activity (mainly street vending). Approximately half of the sample comprised people living under the poverty threshold of 1.9 US\$ per day: 49.3% compared with 49.1% in the general Malian population (2009)<sup>31</sup>. Finally, 11.6% reported mobility between IASGM sites, and declared that Kokoyo was not the first IASGM site where they had worked.

**Table 1. Sample characteristics of participants living in the informal artisanal small-scale gold mining site (IASGM) of Kokoyo in Mali (n=224)**

| Variables                                                 | n (%)      |
|-----------------------------------------------------------|------------|
| <b>Gender</b>                                             |            |
| Male                                                      | 123 (54.9) |
| Female                                                    | 101 (45.1) |
| <b>Age<sup>2</sup></b>                                    |            |
| Ref: 18 to 21 years                                       | 57 (25.4)  |
| 22 to 26                                                  | 60 (26.8)  |
| 27 to 30                                                  | 53 (23.7)  |
| 30+                                                       | 54 (24.1)  |
| <b>Main residence country</b>                             |            |
| Mali                                                      | 133 (59.4) |
| Other countries                                           | 91 (40.6)  |
| <b>Marital status</b>                                     |            |
| Married or living in a couple                             | 158 (70.5) |
| Single, divorced, widowed                                 | 66 (29.5)  |
| <b>Educational level</b>                                  |            |
| Never been to school                                      | 110 (49.1) |
| Primary                                                   | 62 (27.7)  |
| Secondary                                                 | 22 (9.8)   |
| Koranic                                                   | 27 (12.1)  |
| Post-secondary                                            | 3 (1.3)    |
| <b>Category of participant</b>                            |            |
| Malian gold-diggers, tombolomas, and other malian workers | 130 (58)   |
| Women sex-workers                                         | 27 (12,1)  |
| Women non sex-workers                                     | 54 (24,1)  |
| Non-malian gold diggers                                   | 13 (5,8)   |
| <b>Self-perceived health status</b>                       |            |



Good health status 133 (59,4)  
 Ref: Poor health status 91 (40,6)

**Weekly earnings<sup>3</sup>**

Earnings ≤ median 112 (50)  
 Ref: Earnings > median 112 (50)

**Have worked in other IASGM before Kokoyo**

Yes 26 (11.6)  
 No 198 (88.4)

---

*HIV prevalence and new diagnoses*

Seventeen new HIV-positive cases were found with the ARCAD-SIDA testing, among those tested at the time of the survey, and 1 HIV-positive case was self-reported. Overall, HIV prevalence was 8% 95%CI[4.5%, 11.6%]. HIV prevalence was higher in women than in men, respectively, 10.4 95%CI[4.5%, 16.2%] and 5.9% 95%CI[1.7%, 6.5%]. In terms of the 5 different categories studied, the highest HIV prevalence was in women who were not sex-workers (13% 95%CI[5.4%, 20.3%]). Although lower than in the latter group, the prevalence in female sex-workers was still higher (3.7% 95%CI[-3.5%, 10.9%]) at the Kokoyo site than the national prevalence for sex-workers (irrespective of gender). Prevalence in both non-Malian and Malian male gold-diggers was high, respectively, 7.7% 95%CI[-7.4%, 22.8%] (90%CI[-4.9%, 20.4%]) and 6.5% 95%CI[-0.7%, 13.7%] (90%CI[0.5%, 12.6%]), whereas prevalence in males other than gold diggers was 6.4% 95%CI[-0.7%, 13.5%] (90%CI[0.5%, 12.3%]). No HIV-positive case was observed in traditional guards (*tombolomas*).

The quantitative survey showed that 63.4% participants (142 out of 224) had never had a HIV test. Of these, 7 (4.9%) - 5 women and 2 men - tested positive for HIV using ARCAD-SIDA's test. This corresponded to 38.9% of the total 18 (11 women and 7 men) HIV seropositive participants observed, (or 45.5% (5/11) of total HIV women and 28.6% (2/7) of total HIV men). Among the 5 HIV positive cases for women, 1 was a sand washer, 1 was a female sex-worker and 3 were street vendors. Among the 2 HIV positive cases for men, 1 was a non-Malian gold digger and 1 a male street vendor.

*Factors associated to HIV seropositivity*

A multivariate probit regression was implemented to estimate the factors associated with HIV seropositivity among the 224 participants in the quantitative survey (Table 2). Estimates show that

the probability of HIV seropositivity was 7.8% ( $p=0.037$ ) higher for female non sex-workers than for any other category, and this probability increased significantly with age. Indeed, the probability of HIV seropositivity - with respect to the youngest participants (aged between 18 and 21 years) – was 14.1% ( $p=0.034$ ), 14.2% ( $p=0.036$ ) and 16.1% ( $p=0.021$ ) higher for participants aged 22-26 years, 27-29 years, and 30+ years, respectively. Finally, a 10.9% lower probability of HIV seropositivity was observed in participants who perceived their health status as good (versus poor).

**Table 2. Factors associated with HIV seropositivity among participants living in the informal artisanal small-scale gold mining site (IASGM) of Kokoyo in Mali (n=224)**

| Covariates                                             | Marginal Effects <sup>1</sup> (dF/dX) | Coefficient | 95% CI |        | P-value |
|--------------------------------------------------------|---------------------------------------|-------------|--------|--------|---------|
|                                                        |                                       |             | Inf.   | Sup.   |         |
| <b>Intercept</b>                                       |                                       | -2.413      | -3.716 | -1.431 | <0.001  |
| <b>Category of participant</b>                         |                                       |             |        |        |         |
| <b>Ref :</b> Malian gold diggers and <i>tombolomas</i> | Ref.                                  | Ref.        |        |        |         |
| Women sex-workers                                      | 0.019                                 | 0.151       | -1.048 | 1.134  | 0.780   |
| Women non sex-workers                                  | 0.078                                 | 0.624       | 0.046  | 1.231  | 0.036   |
| Non-Malian gold diggers                                | -0.010                                | -0.057      | -1.423 | 1.015  | 0.924   |
| <b>Age<sup>2</sup></b>                                 |                                       |             |        |        |         |
| <b>Ref:</b> 18 to 21 years                             | Ref.                                  | Ref.        |        |        |         |
| 22 to 26                                               | 0.141                                 | 1.105       | 0.175  | 2.332  | 0.036   |
| 27 to 30                                               | 0.142                                 | 1.115       | 0.162  | 2.358  | 0.039   |
| 30+                                                    | 0.161                                 | 1.268       | 0.271  | 2.548  | 0.022   |
| <b>Self-perceived health status</b>                    |                                       |             |        |        |         |
| Good health status                                     | -0.109                                | -0.862      | -1.459 | -0.307 | 0.003   |
| <b>Ref:</b> Poor health status                         | Ref.                                  | Ref.        |        |        |         |
| <b>Weekly earnings<sup>3</sup></b>                     |                                       |             |        |        |         |
| Earnings $\leq$ median                                 | 0.036                                 | 0.282       | -0.261 | 0.840  | 0.310   |
| <b>Ref:</b> Earnings > median                          | Ref.                                  | Ref.        |        |        |         |

<sup>1</sup> Is the change in the probability given the discrete change for dichotomous variables.

<sup>2</sup> Age categories' cut-offs correspond to quartiles.

<sup>3</sup> The median weekly earning is 14 500 FCFA (25 US\$). This variable was used to account for the socioeconomic status of participants.

*Main findings of the qualitative survey*

1  
2  
3 Five focus groups were carried out over 28 participants according to gender and professional status:  
4 6 *tombolomas*, 6 Malian male gold diggers, 5 non-Malian male gold diggers, 5 female sex-workers  
5 and 6 women non sex-workers. Among the discourses identified, one referred to sexual practices,  
6 especially non-systematic condom use, women sex-workers charging extra for condomless sexual  
7 intercourse, and the undisclosed use of condoms by women. Participants attributed these practices  
8 to the following factors: i) the place where sexual intercourse took place: bars *versus* the street; ii)  
9 the nationality/ethnicity of female sex-workers: Malians and Guineans were seen as more “flexible”  
10 than Nigerians (considered as “strict”) with regards to condom use; and iii) the nature of the  
11 relationship between men and women: trustful relationships (considered “safer”) than strictly  
12 commercial-sex relationships (considered “risky”). Another discourse identified referred to health  
13 services access, with the main barrier being the long distances involved. Other barriers mentioned  
14 were the high price of medicines, the lack of specialists and other health care providers, as well as  
15 the low number and poor quality of HIV/STI information/prevention programmes described. These  
16 barriers were also the main reasons why participants resorted to traditional medicine.  
17  
18  
19  
20  
21  
22  
23  
24  
25  
26  
27

## 28 Discussion

29  
30 This is the first study conducted in an informal and artisanal small-scale gold mining site in Mali which  
31 investigates HIV not only in those directly involved in informal mining (i.e. gold diggers), but also in  
32 other populations with a related activity. The aims of this article were drawn up specifically to  
33 respond to the need for the authorities of the IASGM site at Kokoyo to characterize the population  
34 living there, and to provide community-based prevention and HIV testing as part of the health care  
35 services offered.  
36  
37  
38  
39

40 The low educational level observed and the high proportion of participants living with revenues  
41 below the 1.9 US\$ poverty-line threshold, reflects the high level of poverty reported in the literature  
42 concerning IASGM sites in other countries with large gold-bearing zones<sup>22,32</sup>. The fluctuation of the  
43 population at Kokoyo suggests large-scale cyclical migration of workers (i.e. they stay for a period, go  
44 back home, and the next season they return either to the same mine or to another). Rees et al.  
45 suggested they such workers are often separated from their family (i.e. geographically single)<sup>12</sup>,  
46 something confirmed by our results where 71.5% of Malian participants came from other regions of  
47 Mali (non-autochthonous), and 40.6% of the total sample were not Malian. Moreover, geographically  
48 single individuals accounted for 49.4% of the 158 participants who reported being married or living in  
49 a couple. This “bridge population” cohabits with other high-risk groups in the IASGM site at Kokoyo,  
50 representing a potential source for the continued spread of infectious diseases - including HIV - at  
51  
52  
53  
54  
55  
56  
57  
58  
59  
60

1  
2  
3 the site, and at their home <sup>4,5</sup>. Indeed, being single (geographically or not) is associated with risky  
4 behaviours, given the freedom from social norms and the economic difficulties that prevail in IASGM  
5 sites <sup>2</sup>. Furthermore, working conditions and the inherent related dangers which male gold diggers  
6 are confronted with, have also been identified as factors related to an increase in risky behaviours  
7  
8  
9 <sup>3,33</sup>.

10  
11 This is the first time that HIV prevalence has been estimated in an IASGM site in Mali. We found a  
12 prevalence of 8% in the 224 participants in our study, which is much higher than the Malian national  
13 prevalence of 1.3% estimated in 2015<sup>34</sup>, but is in line with the 7% estimated for the IASGM site of  
14 Tenkoto in the Kédougou region of Senegal <sup>35</sup>. In addition, HIV prevalence varied for the different  
15 categories studied, ranging between 3.6% for female sex-workers to 13% for both women gold  
16 diggers and women street vendors. The latter value is in line with the 13% estimated for street  
17 vendors in Burkina Faso, although that value was not specific to IASGM sites <sup>36</sup>. Our estimates not  
18 only reflect the results from the few qualitative studies performed to date which suggest high  
19 prevalence of HIV in IASGM sites, but also highlight that “less classic” groups (i.e. those not directly  
20 involved in mining) are at higher risk <sup>2</sup>. The different HIV prevalence rates found across groups may  
21 reflect the lack of prevention programs adapted to key populations other than sex-workers in Mali.  
22 Most of the efforts in the fight against HIV/AIDS in Mali are concentrated on female sex-workers and  
23 men having sex with other men (MSM), who are identified as the most vulnerable groups. This could  
24 explain - at least in part - the low prevalence rate among female sex-workers in Kokoyo IASGM and  
25 the higher prevalence among other groups, including female non-sex workers and gold-diggers.  
26 Indeed participants from these two categories expressed during the focus groups that prevention  
27 campaigns are mostly directed at female sex-workers, who seem to be more informed about the risk  
28 of HIV contamination and about prevention tools.

29  
30 The acceptability of HIV testing by participants observed in this study demonstrated not only that the  
31 community-based dimension is crucial to conduct this kind of research <sup>2,7</sup>, but that it is also useful for  
32 the provision of prevention and HIV testing to this population. Of the 236 persons invited to test for  
33 HIV, only 5% refused. This is one of the main contributions of our analysis, and highlights the large  
34 demand-supply gap for health care services in Kokoyo. Indeed, the nearest Rural Health Community  
35 Centre (CSCOM, *Centre de Santé Communautaire*) does not provide either prevention or testing for  
36 HIV, and the only two centres of voluntary testing in the Koulikoro region are far from gold-bearing  
37 zones, especially the IASGM site of Kokoyo. This community-based research identified a large  
38 number of new HIV positive cases, and this is another important contribution of the study. More  
39 specifically, 38% of the 18 HIV-positive participants in the quantitative survey were newly diagnosed  
40 using ARCAD-SIDA's rapid tests. Five out of 11 positive cases in women were new diagnoses,  
41  
42  
43  
44  
45  
46  
47  
48  
49  
50  
51  
52  
53  
54  
55  
56  
57  
58  
59  
60

1  
2  
3 especially female street vendors. Although ARCAD-SIDA referred all 18 HIV positive participants to  
4 the nearest regional hospitals (CSREF) in order to link them to care, the emerging question is whether  
5 or not these participants subsequently initiated and adhered to antiretroviral treatment given the  
6 distance of more than 100km between Kokoyo and Kangaba city where the CSREF is located.  
7 Unfortunately, we have no information about lost-to-follow-up rates in people living with HIV in the  
8 context of IASGM sites, but presumably these rates are high given that HIV is not of primary concern  
9 to people in IASGM sites, as suggested by Campbell <sup>3</sup>. This certainly seems to be the situation in  
10 Kokoyo, where the large majority of study participants aware of HIV (over 90%) had never previously  
11 gone for a test (63.4%). Multivariate analyses indicated that female non sex-workers, the eldest  
12 participants, and those with poor self-perceived health status were the three sub-populations most  
13 associated with HIV seropositivity.  
14  
15  
16  
17  
18  
19

20  
21 Some limitations should be acknowledged. First, the study sample is not representative of the whole  
22 population in IASGM sites in Mali. However, our results reflect those in the literature. Second, the  
23 cross-sectional design of the Sanu Gundo survey did not enable us to analyse changes over time  
24 concerning different aspects, such as living and working conditions, seasonal mobility, and sexual  
25 behaviour. Furthermore, although the participants who tested positive for HIV during the study were  
26 referred to the regional hospital, the design of the survey did not allow us collect subsequent  
27 information, either concerning linkage-to-care or antiretroviral treatment initiation. Finally, there is a  
28 possibility of selection bias, as the sample was drawn from the healthcare conversation audience  
29 organized by ARCAD-SIDA. Nevertheless, any selection bias would reflect an audience mainly  
30 comprising individuals interested in prevention and to some extent, worried about health issues,  
31 especially HIV. One would expect that any future study whose design were to attract participants  
32 other than those already interested in health care, would result in higher HIV prevalence being  
33 measured and would accentuate the precarious characteristics already described by our survey at  
34 Kokoyo. Despite these limitations, our study contributes to the existing literature by creating a  
35 knowledge base which could be a useful first step for the development of suitable surveys and  
36 interventions.  
37  
38  
39  
40  
41  
42  
43  
44  
45  
46  
47

## 48 **Conclusion**

49  
50 The results of this study demonstrate the importance of focusing on different categories of workers  
51 and the necessity to conduct further similar research on other Malian IASGM sites, in order to  
52 account for structural and geographical heterogeneity. The present article contributes to the  
53 literature by reopening the debate about the impact of health issues on IASGM activities, especially  
54 HIV issues, in a context where the sustained spread of this disease could not only harm efforts in the  
55  
56  
57  
58  
59  
60

1  
2  
3 fight against AIDS, but also have important negative consequences on one of the main cornerstones  
4 of the Malian economy. Integrated policy-making should pay special attention to infectious diseases  
5 among populations in IASGM zones. Bringing information/prevention activities closer to people  
6 working in gold-bearing zones is an urgent public health action.  
7  
8  
9

### 10 11 12 **Authors' contribution**

13  
14 LST designed and led the study and wrote the first draft of the report. LST, MSM, BS and BDK  
15 designed the analysis. LST, HB and FD analysed the data. MM and MB oversaw data management. All  
16 authors critically reviewed and approved the manuscript.  
17  
18  
19  
20  
21  
22  
23

### 24 25 **References**

- 26  
27 1. A Simple Public Health Strategy for ASGM - Artisanal Gold Council. (2014). Available  
28 at: <http://www.artisanalgold.org/publications/articles/a-simple-public-health-strategy-for->  
29 [asgm.](http://www.artisanalgold.org/publications/articles/a-simple-public-health-strategy-for-) (Accessed: 28th August 2016)  
30  
31  
32  
33 2. Desmond, N. *et al.* A typology of groups at risk of HIV/STI in a gold mining town in  
34 north-western Tanzania. *Soc. Sci. Med.* **60**, 1739–1749 (2005).  
35  
36  
37 3. Campbell, C. Migrancy, masculine identities and AIDS: the psychosocial context of HIV  
38 transmission on the South African gold mines. *Soc. Sci. Med.* **45**, 273–281 (1997).  
39  
40  
41  
42 4. Cates, W. J. & Dallabetta, G. The staying power of sexually transmitted diseases. *The*  
43 *Lancet* **354 (S4)**, (1999).  
44  
45  
46  
47 5. Jokonya, O. Towards a Big Data Framework for the Prevention and Control of  
48 HIV/AIDS, TB and Silicosis in the Mining Industry. *Procedia Technol.* **16**, 1533–1541  
49 (2014).  
50  
51  
52  
53 6. Kiš, A. D. ABC for AIDS prevention in Guinea: migrant gold mining communities  
54 address their risks. *AIDS Care* **22**, 520–525 (2010).  
55  
56  
57  
58  
59  
60

- 1  
2  
3 7. Day, J. H. *et al.* Attitudes to HIV voluntary counselling and testing among mineworkers  
4  
5 in South Africa: Will availability of antiretroviral therapy encourage testing? *AIDS Care*  
6  
7 **15**, 665–672 (2003).
- 8  
9 8. Sikasote, J., Grant, L., Chinn, D. J., Macwang'i, M. & Murray, S. A. Voluntary  
10  
11 counselling and testing for HIV in a Zambian mining community: serial interviews with  
12  
13 people testing negative. *Sex. Transm. Infect.* **87**, 433–438 (2011).
- 14  
15 9. Lightfoot, E., Maree, M. & Ananias, J. Exploring the relationship between HIV and  
16  
17 alcohol use in a remote Namibian mining community. *Afr. J. AIDS Res.* **8**, 321–327  
18  
19 (2009).
- 20  
21 10. Siu, G. E., Seeley, J. & Wight, D. Dividuality, masculine respectability and reputation:  
22  
23 How masculinity affects men's uptake of HIV treatment in rural eastern Uganda. *Soc. Sci.*  
24  
25 *Med.* **89**, 45–52 (2013).
- 26  
27 11. Siu, G. E., Wight, D. & Seeley, J. How a masculine work ethic and economic  
28  
29 circumstances affect uptake of HIV treatment: experiences of men from an artisanal gold  
30  
31 mining community in rural eastern Uganda. *J. Int. AIDS Soc.* **15**, (2012).
- 32  
33 12. Rees, D., Murray, J., Nelson, G. & Sonnenberg, P. Oscillating migration and the  
34  
35 epidemics of silicosis, tuberculosis, and HIV infection in South African gold miners. *Am.*  
36  
37 *J. Ind. Med.* **53**, 398–404 (2009).
- 38  
39 13. Stevens, W., Apostolellis, A., Napier, G., Scott, L. & Gresak, G. HIV/AIDS prevalence  
40  
41 testing-merits, methodology and outcomes of a survey conducted at a large mining  
42  
43 organisation in South Africa. *S. Afr. Med. J.* **96**, 134 (2008).
- 44  
45 14. Diallo, B.-L., Alary, M., Rashed, S. & Barry, A. Épidémie du VIH chez les hommes  
46  
47 travaillant dans les mines industrielles de Guinée : séroprévalence, facteurs de risque  
48  
49 associés et tendance 2001–2007. *Rev. D'Épidémiologie Santé Publique* **59**, 251–257  
50  
51 (2011).
- 52  
53  
54  
55  
56  
57  
58  
59  
60



- 1  
2  
3 15. Palmer, C. J. *et al.* HIV prevalence in a gold mining camp in the Amazon region, Guyana.  
4  
5 (2002).  
6
- 7 16. Clift, S. *et al.* Variations of HIV and STI prevalences within communities neighbouring  
8  
9 new goldmines in Tanzania: importance for intervention design. *Sex. Transm. Infect.* **79**,  
10  
11 307–312 (2003).  
12
- 13 17. Traore, M. Some critical reflections on the future of gold mining in Mali. *Extr. Ind. Soc.*  
14  
15 **3**, 367–369 (2016).  
16
- 17 18. Bastagli, F., Toulmin, C., European Parliament & Directorate-General for External  
18  
19 Policies of the Union. *Mali, the economic factors behind the crisis*. (Publications Office,  
20  
21 2014).  
22
- 23 19. *Initiative pour la transparence dans les industries extractives ITIE-Mali: Rapport ITIE*  
24  
25 *pour l'année 2013*. (2013).  
26  
27
- 28 20. Keita, S. Study on artisanal and small-scale mining in Mali. *Min. Miner. Sustain. Dev.*  
29  
30 *MMSD Work. Pap.* **80**, (2001).  
31  
32
- 33 21. Hilson, G. & McQuilken, J. Four decades of support for artisanal and small-scale mining  
34  
35 in sub-Saharan Africa: A critical review. *Extr. Ind. Soc.* **1**, 104–118 (2014).  
36  
37
- 38 22. Buxton, A. Responding to the challenge of artisanal and small-scale mining. *Can Knowl.*  
39  
40 *Netw. Help* (2013).  
41  
42
- 43 23. Teschner, B. A. “Orpaillage pays for everything”: How artisanal mining supported rural  
44  
45 institutions following Mali’s coup d’état. *Futures* **62**, 140–150 (2014).  
46  
47
- 48 24. Verbrugge, B. Voices from below: Artisanal- and small-scale mining as a product and  
49  
50 catalyst of rural transformation. *J. Rural Stud.* **47**, 108–116 (2016).  
51
- 52 25. Onukwugha, E., Bergtold, J. & Jain, R. A Primer on Marginal Effects—Part I: Theory and  
53  
54 Formulae. *PharmacoEconomics* **33**, 25–30 (2015).  
55  
56  
57  
58  
59  
60



- 1  
2  
3 26. Onukwugha, E., Bergtold, J. & Jain, R. A Primer on Marginal Effects—Part II: Health  
4  
5 Services Research Applications. *PharmacoEconomics* **33**, 97–103 (2015).  
6  
7  
8 27. Greene, W. H. *Econometric Analysis*. (Pearson Prentice Hall, 1997).  
9  
10 28. R Core Team. *R: A language and environment for statistical computing*. R Foundation for  
11  
12 *Statistical Computing*. (2016).  
13  
14 29. Flick, U. *Managing quality in qualitative research*. (Sage, 2008).  
15  
16 30. Caillaud, S. & Kalampalikis, N. Focus Groups and Ecological Practices: A Psychosocial  
17  
18 Approach. *Qual. Res. Psychol.* **10**, 382–401 (2013).  
19  
20 31. Ratio de la population pauvre en fonction du seuil de pauvreté national (% de la  
21  
22 population rurale) | Data. Available at:  
23  
24 <http://donnees.banquemondiale.org/indicateur/SI.POV.RUHC?locations=ML>. (Accessed:  
25  
26 22nd August 2016)  
27  
28  
29 32. Yakovleva, N. Perspectives on female participation in artisanal and small-scale mining: A  
30  
31 case study of Birim North District of Ghana. *Resour. Policy* **32**, 29–41 (2007).  
32  
33  
34 33. Bellaby, P. To risk or not to risk? Uses and limitations of Mary Douglas on risk  
35  
36 acceptability for understanding health and safety at work and road accidents. *Sociol. Rev.*  
37  
38 **38**, 465–483 (1990).  
39  
40 34. Mali | UNAIDS. Available at: <http://www.unaids.org/en/regionscountries/countries/mali>.  
41  
42 (Accessed: 22nd August 2016)  
43  
44  
45 35. *Focus sur Bantako, zone d'orpillage traditionnelle: La vulnérabilité au VIH dans les*  
46  
47 *zones d'orpillages traditionnelles*. (2009).  
48  
49 36. *Programme d'appui au monde associatif et communautaire (PAMAC): pour la période*  
50  
51 *2011-2015*. (2011).  
52  
53  
54  
55

56 **Competing statement: Authors declare no conflict of interest**

57  
58 **Data sharing statement:**  
59  
60

1  
2  
3 Full dataset and statistical code available from the corresponding author [luis.sagaon-teyssier@inserm.fr](mailto:luis.sagaon-teyssier@inserm.fr) The  
4 presented data are anonymized and risk of identification is null.  
5  
6  
7  
8  
9  
10  
11  
12  
13  
14  
15  
16  
17  
18  
19  
20  
21  
22  
23  
24  
25  
26  
27  
28  
29  
30  
31  
32  
33  
34  
35  
36  
37  
38  
39  
40  
41  
42  
43  
44  
45  
46  
47  
48  
49  
50  
51  
52  
53  
54  
55  
56  
57  
58  
59  
60

For peer review only

STROBE 2007 (v4) Statement—Checklist of items that should be included in reports of cross-sectional studies

| Section/Topic             | Item # | Recommendation                                                                                                                                                                       | Reported on page # |
|---------------------------|--------|--------------------------------------------------------------------------------------------------------------------------------------------------------------------------------------|--------------------|
| Title and abstract        | 1      | (a) Indicate the study’s design with a commonly used term in the title or the abstract                                                                                               | 1                  |
|                           |        | (b) Provide in the abstract an informative and balanced summary of what was done and what was found                                                                                  | 2                  |
| <b>Introduction</b>       |        |                                                                                                                                                                                      |                    |
| Background/rationale      | 2      | Explain the scientific background and rationale for the investigation being reported                                                                                                 | 2-3                |
| Objectives                | 3      | State specific objectives, including any prespecified hypotheses                                                                                                                     | 3                  |
| <b>Methods</b>            |        |                                                                                                                                                                                      |                    |
| Study design              | 4      | Present key elements of study design early in the paper                                                                                                                              | 4                  |
| Setting                   | 5      | Describe the setting, locations, and relevant dates, including periods of recruitment, exposure, follow-up, and data collection                                                      | 4                  |
| Participants              | 6      | (a) Give the eligibility criteria, and the sources and methods of selection of participants                                                                                          | 4                  |
| Variables                 | 7      | Clearly define all outcomes, exposures, predictors, potential confounders, and effect modifiers. Give diagnostic criteria, if applicable                                             | 4                  |
| Data sources/ measurement | 8*     | For each variable of interest, give sources of data and details of methods of assessment (measurement). Describe comparability of assessment methods if there is more than one group | NA                 |
| Bias                      | 9      | Describe any efforts to address potential sources of bias                                                                                                                            | 4                  |
| Study size                | 10     | Explain how the study size was arrived at                                                                                                                                            | 4                  |
| Quantitative variables    | 11     | Explain how quantitative variables were handled in the analyses. If applicable, describe which groupings were chosen and why                                                         | 4                  |
| Statistical methods       | 12     | (a) Describe all statistical methods, including those used to control for confounding                                                                                                | 4                  |
|                           |        | (b) Describe any methods used to examine subgroups and interactions                                                                                                                  | NA                 |
|                           |        | (c) Explain how missing data were addressed                                                                                                                                          | NA                 |
|                           |        | (d) If applicable, describe analytical methods taking account of sampling strategy                                                                                                   | NA                 |
|                           |        | (e) Describe any sensitivity analyses                                                                                                                                                | NA                 |
| <b>Results</b>            |        |                                                                                                                                                                                      |                    |

|                          |     |                                                                                                                                                                                                              |    |
|--------------------------|-----|--------------------------------------------------------------------------------------------------------------------------------------------------------------------------------------------------------------|----|
| Participants             | 13* | (a) Report numbers of individuals at each stage of study—eg numbers potentially eligible, examined for eligibility, confirmed eligible, included in the study, completing follow-up, and analysed            | NA |
|                          |     | (b) Give reasons for non-participation at each stage                                                                                                                                                         | NA |
|                          |     | (c) Consider use of a flow diagram                                                                                                                                                                           | NA |
| Descriptive data         | 14* | (a) Give characteristics of study participants (eg demographic, clinical, social) and information on exposures and potential confounders                                                                     | 5  |
|                          |     | (b) Indicate number of participants with missing data for each variable of interest                                                                                                                          | NA |
| Outcome data             | 15* | Report numbers of outcome events or summary measures                                                                                                                                                         | 6  |
| Main results             | 16  | (a) Give unadjusted estimates and, if applicable, confounder-adjusted estimates and their precision (eg, 95% confidence interval). Make clear which confounders were adjusted for and why they were included | 7  |
|                          |     | (b) Report category boundaries when continuous variables were categorized                                                                                                                                    | 7  |
|                          |     | (c) If relevant, consider translating estimates of relative risk into absolute risk for a meaningful time period                                                                                             | NA |
| Other analyses           | 17  | Report other analyses done—eg analyses of subgroups and interactions, and sensitivity analyses                                                                                                               | NA |
| <b>Discussion</b>        |     |                                                                                                                                                                                                              |    |
| Key results              | 18  | Summarise key results with reference to study objectives                                                                                                                                                     | 8  |
| Limitations              | 19  | Discuss limitations of the study, taking into account sources of potential bias or imprecision. Discuss both direction and magnitude of any potential bias                                                   | 10 |
| Interpretation           | 20  | Give a cautious overall interpretation of results considering objectives, limitations, multiplicity of analyses, results from similar studies, and other relevant evidence                                   | 10 |
| Generalisability         | 21  | Discuss the generalisability (external validity) of the study results                                                                                                                                        | 10 |
| <b>Other information</b> |     |                                                                                                                                                                                                              |    |
| Funding                  | 22  | Give the source of funding and the role of the funders for the present study and, if applicable, for the original study on which the present article is based                                                |    |

\*Give information separately for cases and controls in case-control studies and, if applicable, for exposed and unexposed groups in cohort and cross-sectional studies.

**Note:** An Explanation and Elaboration article discusses each checklist item and gives methodological background and published examples of transparent reporting. The STROBE checklist is best used in conjunction with this article (freely available on the Web sites of PLoS Medicine at <http://www.plosmedicine.org/>, Annals of Internal Medicine at <http://www.annals.org/>, and Epidemiology at <http://www.epidem.com/>). Information on the STROBE Initiative is available at [www.strobe-statement.org](http://www.strobe-statement.org).
